# Supplementary material
Source: publisher figshare collection journal article supplement (https://tandf.figshare.com/articles/dataset/_/23580259)
Supplement: Supplementary file 1 [file 3]

## Sheet: Inflation
observation_date	pi_PCEcore_yy	pi_PCE_yy	pi_PCEcore_annualised	pi_PCE_annualised	pi_PCEcore_qq	pi_PCE_qq
1959.25	N/A	N/A	N/A	N/A	N/A	N/A
1959.5	N/A	N/A	2.1515	1.62597	0.53217	0.403222
1959.75	N/A	N/A	2.70455	2.43221	0.667156	0.600775
1960	N/A	N/A	2.31764	2.20883	0.572798	0.546198
1960.25	2.08655	1.68068	1.26565	0.523292	0.314426	0.130482
1960.5	1.93389	1.79769	1.52961	2.10273	0.379507	0.520231
1960.75	1.65641	1.56916	1.57094	1.50015	0.389683	0.372252
1961	1.41202	1.46624	1.32227	1.7889	0.328401	0.443272
1961.25	1.26716	1.52255	0.680598	0.749974	0.169573	0.186794
1961.5	1.21635	0.986263	1.32345	-0.0641977	0.328692	-0.0160546
1961.75	1.26134	0.974618	1.75389	1.45288	0.434671	0.360606
1962	1.17339	0.641272	0.966473	0.440674	0.240458	0.109926
1962.25	1.37102	0.885023	1.47965	1.7371	0.367203	0.430545
1962.5	1.42711	1.25449	1.55103	1.42369	0.38478	0.353413
1962.75	1.32108	1.16109	1.32323	1.07456	0.328637	0.267208
1963	1.26712	1.35708	0.748798	1.23118	0.186502	0.305916
1963.25	1.2325	1.21384	1.3392	1.15583	0.332579	0.2873
1963.5	1.22406	1.0175	1.51674	0.630279	0.376338	0.157075
1963.75	1.27965	1.23176	1.54881	1.94453	0.384236	0.481466
1964	1.57416	1.29613	1.94266	1.49216	0.481007	0.370284
1964.25	1.66311	1.47847	1.70041	1.89635	0.421528	0.469648
1964.5	1.58704	1.53994	1.20832	0.878014	0.30027	0.218546
1964.75	1.47833	1.38637	1.10821	1.32019	0.275528	0.327888
1965	1.25014	1.34674	1.0164	1.33141	0.252817	0.330655
1965.25	1.20482	1.20092	1.51621	1.30373	0.376208	0.323826
1965.5	1.21759	1.48424	1.26001	2.02775	0.313035	0.501866
1965.75	1.25049	1.52873	1.24138	1.50068	0.308435	0.372383
1966	1.33044	1.50482	1.33997	1.23453	0.332767	0.306743
1966.25	1.45312	1.95126	2.01556	3.12904	0.49888	0.77027
1966.5	1.94705	2.26217	3.28053	3.30453	0.806968	0.812777
1966.75	2.4621	2.64801	3.3488	3.07933	0.823488	0.758218
1967	2.98992	3.11027	3.50225	3.12383	0.86058	0.769008
1967.25	3.0415	2.63098	2.22628	1.17069	0.550465	0.290972
1967.5	2.9015	2.29218	2.70379	1.91403	0.66697	0.473986
1967.75	2.98275	2.45904	3.68522	3.76959	0.904734	0.925069
1968	3.12585	2.54589	4.09639	3.48273	1.00368	0.855864
1968.25	3.70688	3.31411	4.62999	4.32779	1.1315	1.05919
1968.5	4.19694	3.85847	4.73688	4.15748	1.15703	1.01834
1968.75	4.40482	3.96226	4.55095	4.20131	1.11261	1.02886
1969	4.55669	4.20704	4.73071	4.50093	1.15555	1.10064
1969.25	4.51298	4.11274	4.44722	3.93501	1.08779	0.96489
1969.5	4.54631	4.35879	4.87661	5.18763	1.19036	1.26439
1969.75	4.58184	4.54708	4.69962	4.98911	1.14813	1.21716
1970	4.59083	4.59499	4.76841	4.70136	1.16455	1.14855
1970.25	4.58982	4.7834	4.44297	4.72126	1.08677	1.1533
1970.5	4.52308	4.61758	4.59699	4.49225	1.12362	1.09857
1970.75	4.48008	4.36988	4.5197	3.95404	1.10513	0.969467
1971	4.71067	4.51046	5.73924	5.29175	1.39515	1.28912
1971.25	4.8831	4.29888	5.16584	3.83873	1.25921	0.941722
1971.5	4.89338	4.33411	4.64	4.63962	1.13389	1.1338
1971.75	4.72653	4.34174	3.82446	3.98574	0.938286	0.97709
1972	3.9004	3.67111	2.30216	2.50484	0.569014	0.618495
1972.25	3.59509	3.77914	3.88932	4.28842	0.953898	1.04975
1972.5	3.13503	3.221	2.73197	2.32939	0.673829	0.575667
1972.75	2.94663	3.11816	3.04501	3.55884	0.749892	0.874245
1973	3.00332	3.31239	2.53439	3.3043	0.625703	0.812721
1973.25	2.74389	3.4601	2.81683	4.90642	0.694471	1.19746
1973.5	3.42308	4.78857	5.56117	7.91413	1.35301	1.90414
1973.75	3.99345	5.71764	5.42302	7.47978	1.32027	1.80331
1974	4.74981	6.93108	5.68388	8.44211	1.38206	2.02616
1974.25	5.75809	8.66619	7.04831	12.446	1.70275	2.93257
1974.5	6.85872	9.55325	10.3123	11.8119	2.45364	2.79121
1974.75	8.35764	10.4141	11.9372	11.245	2.81919	2.66412
1975	9.38736	10.8963	10.1277	10.5541	2.41177	2.50838
1975.25	9.62213	9.8279	8.05832	7.74185	1.93752	1.8642
1975.5	8.67873	8.25691	6.22716	5.00194	1.51024	1.22022
1975.75	7.35073	7.44735	6.14626	7.70029	1.49119	1.85455
1976	6.55421	6.60338	6.67431	6.88427	1.61526	1.66441
1976.25	6.12562	5.83435	6.22159	4.47804	1.50893	1.09517
1976.5	5.80634	5.44564	4.87914	3.38195	1.19096	0.831505
1976.75	5.86916	5.09907	6.41332	6.21758	1.55401	1.50799
1977	5.80743	5.00394	6.41125	6.47833	1.55353	1.56928
1977.25	5.9658	5.69638	6.89662	7.41228	1.6673	1.78761
1977.5	6.29386	6.56129	6.26446	7.02119	1.51902	1.69642
1977.75	6.38857	6.54583	6.81723	6.15192	1.64873	1.49253
1978	6.27821	6.38905	5.94254	5.81263	1.44317	1.41249
1978.25	6.15894	6.2282	6.38786	6.72341	1.54803	1.62676
1978.5	6.35028	6.56384	7.08088	8.46773	1.71036	2.03206
1978.75	6.40208	6.81407	7.03876	7.21972	1.70052	1.74275
1979	6.73795	7.27193	7.37546	7.7684	1.77904	1.87036
1979.25	6.5489	7.51189	5.58639	7.75273	1.35898	1.86672
1979.5	7.01183	8.17451	9.0822	11.3811	2.17329	2.69468
1979.75	7.14015	8.88357	7.5896	10.3043	1.82884	2.45181
1980	7.42673	9.40462	8.6134	10.0381	2.06561	2.39141
1980.25	8.48404	10.4952	10.1477	12.5573	2.41629	2.9573
1980.5	8.52265	10.2193	9.2508	10.1588	2.2119	2.41881
1980.75	8.89572	10.0789	9.2072	9.68633	2.20192	2.31136
1981	9.23827	10.1323	10.1119	10.2736	2.40816	2.44486
1981.25	9.01507	9.73496	9.16861	10.7823	2.19308	2.55992
1981.5	8.67532	8.98084	7.77613	6.88546	1.87215	1.66469
1981.75	8.29853	8.30249	7.57363	6.75014	1.82513	1.63302
1982	7.65218	7.379	7.3015	6.27444	1.76181	1.52137
1982.25	6.9135	6.08123	5.99019	5.17825	1.45441	1.26216
1982.5	6.38494	5.37442	5.52138	3.90586	1.34359	0.957878
1982.75	6.14961	5.30916	6.56578	6.47182	1.58981	1.56775
1983	5.77126	4.88477	5.68982	4.48563	1.38346	1.09698
1983.25	5.62237	4.44539	5.36083	3.34587	1.30552	0.822779
1983.5	5.03984	4.39851	3.09104	3.7112	0.761057	0.910997
1983.75	4.95765	4.1364	6.21598	5.36135	1.50761	1.30564
1984	4.37093	3.69687	3.23832	2.66468	0.796748	0.65745
1984.25	4.07125	3.94893	4.10538	4.39312	1.00584	1.07484
1984.5	4.47371	4.00176	4.76407	3.93059	1.16352	0.963827
1984.75	3.90131	3.46481	3.81169	3.12253	0.93521	0.768693
1985	3.81264	3.42194	2.87279	2.48879	0.708075	0.614582
1985.25	4.16181	3.51999	5.56963	4.80335	1.35501	1.17289
1985.5	3.86262	3.3641	3.51773	3.28455	0.864318	0.80794
1985.75	3.94893	3.37689	4.17073	3.17527	1.02152	0.781474
1986	3.95574	3.4571	2.9008	2.81815	0.714881	0.694793
1986.25	3.67591	2.99084	4.39457	2.86686	1.07519	0.706634
1986.5	3.49408	2.07688	2.76755	-0.423168	0.682486	-0.106016
1986.75	3.15636	1.8213	2.77298	2.12586	0.683806	0.525895
1987	3.25109	1.72957	3.29143	2.44155	0.809606	0.603056
1987.25	2.80096	1.96003	2.53177	3.81951	0.625063	0.937093
1987.5	3.08335	3.02556	3.93496	3.91265	0.964878	0.959511
1987.75	3.2902	3.44235	3.62685	3.84274	0.890657	0.942687
1988	3.49221	3.69975	4.12943	3.50174	1.01161	0.860456
1988.25	3.82745	3.54874	3.91594	3.19432	0.960303	0.78609
1988.5	4.06824	3.68801	4.94087	4.49314	1.20567	1.09878
1988.75	4.32206	3.96955	4.68432	5.01875	1.14448	1.22422
1989	4.42236	4.11569	4.54803	4.10856	1.11191	1.0066
1989.25	4.54719	4.47179	4.43609	4.67474	1.08513	1.14219
1989.5	4.24632	4.71156	3.68551	5.50015	0.904804	1.33856
1989.75	3.84434	4.07479	3.01453	2.37762	0.742497	0.587448
1990	3.64301	3.8521	3.70948	3.18529	0.910582	0.783903
1990.25	3.70367	4.14939	4.68978	5.92694	1.14578	1.43949
1990.5	3.90958	3.71389	4.54303	3.67824	1.11071	0.903051
1990.75	4.17256	4.38952	4.1039	5.18212	1.00548	1.26308
1991	4.09769	4.9196	3.39934	5.39652	0.83571	1.31399
1991.25	3.8357	4.00461	3.5984	2.12015	0.883793	0.524497
1991.5	3.49244	3.64581	3.11744	2.20087	0.767459	0.544251
1991.75	3.38388	3.05967	3.65281	2.74474	0.89692	0.676936
1992	3.33229	2.46898	3.18616	2.93546	0.784114	0.723299
1992.25	3.20956	2.56898	3.09109	2.52943	0.76107	0.624492
1992.5	3.146	2.68814	2.85559	2.68917	0.703894	0.663413
1992.75	2.8401	2.64652	2.39225	2.57382	0.591021	0.635313
1993	2.78597	2.61836	2.96298	2.81961	0.729984	0.695147
1993.25	2.71143	2.58763	2.78419	2.40347	0.686534	0.593761
1993.5	2.76378	2.59401	3.07116	2.71539	0.756237	0.669794
1993.75	2.73051	2.39165	2.25608	1.74688	0.557751	0.432948
1994	2.51401	2.27119	2.07519	2.32536	0.513489	0.574684
1994.25	2.27941	2.03481	1.82415	1.43982	0.451929	0.357388
1994.5	2.19428	1.92202	2.72081	2.25302	0.671113	0.557004
1994.75	2.19358	2.20413	2.25322	2.90153	0.557054	0.715059
1995	2.18609	2.09816	2.04461	1.89253	0.505997	0.468711
1995.25	2.25698	2.22835	2.11328	1.96943	0.522814	0.487573
1995.5	2.17806	2.25145	2.39705	2.34756	0.592192	0.580106
1995.75	2.09706	1.94427	1.92246	1.6449	0.476053	0.407879
1996	2.09102	1.91406	2.01995	1.76948	0.499955	0.438501
1996.25	1.96019	1.98098	1.58032	2.24275	0.391991	0.554492
1996.5	1.84199	2.06806	1.91407	2.70468	0.473995	0.667187
1996.75	1.82152	2.08558	1.839	1.71616	0.455574	0.425401
1997	1.88954	2.32596	2.29791	2.75273	0.567978	0.678882
1997.25	1.88958	2.21194	1.5805	1.77751	0.392034	0.440474
1997.5	1.93592	1.79514	2.10314	1.00657	0.520333	0.250384
1997.75	1.71327	1.63333	0.936055	1.05994	0.232925	0.263591
1998	1.4613	1.26762	1.27207	1.26056	0.316013	0.313171
1998.25	1.36335	0.834706	1.18325	0.0302485	0.294076	0.00756098
1998.5	1.14901	0.764727	1.23151	0.724228	0.305998	0.180404
1998.75	1.27084	0.810088	1.42914	1.24348	0.354757	0.308952
1999	1.27194	0.759904	1.27651	1.0575	0.317108	0.262986
1999.25	1.30198	1.01376	1.30493	1.05115	0.324122	0.261416
1999.5	1.31822	1.37867	1.29728	2.20522	0.322234	0.545315
1999.75	1.30813	1.59901	1.38823	2.13974	0.344671	0.529291
2000	1.44096	1.92446	1.81603	2.38169	0.449933	0.588443
2000.25	1.66398	2.49355	2.21267	3.37779	0.547137	0.830499
2000.5	1.65908	2.39597	1.27744	1.80709	0.317338	0.447739
2000.75	1.76589	2.48337	1.82234	2.49743	0.451483	0.616687
2001	1.79492	2.44616	1.93432	2.22943	0.478963	0.551236
2001.25	1.82311	2.29028	2.328	2.73523	0.575329	0.674623
2001.5	1.88398	2.31025	1.52432	1.88843	0.378205	0.467704
2001.75	1.70044	1.75286	1.07754	0.237486	0.267943	0.0593011
2002	1.72663	1.26298	2.04115	0.24571	0.505148	0.0613521
2002.25	1.44208	0.77552	1.16993	0.75146	0.290785	0.187163
2002.5	1.63494	1.06662	2.31053	3.08176	0.571059	0.758807
2002.75	1.86609	1.49548	2.01647	1.97183	0.499102	0.48816
2003	1.71078	1.89495	1.40918	1.86037	0.349835	0.460818
2003.25	1.66044	2.41071	0.966422	2.85159	0.240446	0.702922
2003.5	1.38322	1.67792	1.18229	0.104113	0.293839	0.0260148
2003.75	1.29405	1.80522	1.65323	2.49242	0.409929	0.615466
2004	1.35364	1.80222	1.65119	1.84815	0.409428	0.45782
2004.25	1.72771	1.92619	2.4885	3.36285	0.614509	0.826886
2004.5	2.01838	2.58333	2.3656	2.77032	0.584514	0.683161
2004.75	1.97945	2.47118	1.49505	2.03367	0.370996	0.503316
2005	2.10961	2.8637	2.1818	3.45984	0.539585	0.850334
2005.25	2.19067	2.60528	2.82138	2.29992	0.695579	0.568468
2005.5	2.06469	2.52098	1.85102	2.42436	0.458525	0.59886
2005.75	2.06767	3.07985	1.50715	4.34032	0.373976	1.06219
2006	2.17536	3.00716	2.62291	3.15947	0.647276	0.777645
2006.25	2.04328	2.94398	2.27963	2.04169	0.563508	0.505283
2006.5	2.29376	3.14545	2.87661	3.25313	0.709002	0.800335
2006.75	2.45781	2.80184	2.17544	2.91603	0.538028	0.718581
2007	2.23852	1.85537	1.72667	-0.673056	0.427982	-0.168833
2007.25	2.39699	2.29101	2.93	3.83544	0.721975	0.940929
2007.5	2.05861	2.29856	1.49355	3.28431	0.370626	0.807883
2007.75	2.00878	2.14164	1.97199	2.27207	0.488199	0.56166
2008	2.22816	3.28801	2.62328	3.98761	0.647365	0.977538
2008.25	2.06045	3.18202	2.24181	3.39617	0.554263	0.834943
2008.5	2.16739	3.39751	1.9286	4.1784	0.477558	1.02336
2008.75	2.14813	3.86599	1.89347	4.20665	0.468943	1.03014
2009	1.54729	1.37707	0.186281	-5.86643	0.0465269	-1.51139
2009.25	1.08461	-0.0596634	0.366994	-2.37841	0.0915806	-0.601788
2009.5	1.05704	-0.634461	1.81626	1.81046	0.44999	0.448567
2009.75	0.942167	-0.97607	1.42635	2.79242	0.354069	0.688536
2010	1.51747	1.30578	2.5185	3.12985	0.621827	0.770468
2010.25	1.71563	2.24919	1.16572	1.37586	0.289745	0.341621
2010.5	1.48827	1.91342	0.894495	0.452221	0.222629	0.1128
2010.75	1.26844	1.40099	0.538391	0.706908	0.134237	0.176105
2011	0.91936	1.23425	1.09697	2.44428	0.272749	0.603721
2011.25	1.10309	1.7626	1.91195	3.54113	0.473474	0.869968
2011.5	1.46338	2.62996	2.35909	3.99853	0.582923	0.980164
2011.75	1.81019	2.93782	1.9428	1.95472	0.481042	0.483965
2012	1.90725	2.67455	1.49025	1.37114	0.369814	0.340456
2012.25	2.08891	2.4884	2.65516	2.77302	0.655131	0.683817
2012.5	1.91745	1.74773	1.65946	0.962556	0.411461	0.239488
2012.75	1.7201	1.54966	1.14122	1.15016	0.28369	0.285898
2013	1.79138	1.76928	1.78006	2.26561	0.441101	0.56008
2013.25	1.53185	1.44062	1.59498	1.43073	0.395599	0.355149
2013.5	1.43022	1.2757	1.24702	0.298737	0.309827	0.0745729
2013.75	1.53181	1.39371	1.55307	1.62874	0.385284	0.403904
2014	1.56591	1.24081	1.91899	1.64208	0.475203	0.407187
2014.25	1.49866	1.35244	1.32204	1.88465	0.328344	0.466778
2014.5	1.657	1.75512	1.89033	1.92734	0.468172	0.47725
2014.75	1.64133	1.61986	1.48943	1.08039	0.369612	0.268648
2015	1.43987	1.08524	1.10099	-0.50845	0.273742	-0.127437
2015.25	1.29371	0.180577	0.731408	-1.73629	0.182187	-0.437884
2015.5	1.25064	0.195569	1.71492	1.98848	0.425094	0.492243
2015.75	1.21961	0.208594	1.36356	1.13306	0.338588	0.281672
2016	1.19278	0.25342	0.992551	-0.329897	0.246914	-0.0826105
2016.25	1.42288	0.733264	1.66281	0.167978	0.412284	0.0419592
2016.5	1.49502	0.833024	2.00884	2.39627	0.497232	0.592003
2016.75	1.64243	0.968151	1.96301	1.68117	0.485997	0.416799
2017	1.75464	1.49828	1.44688	1.80617	0.359129	0.447514
2017.25	1.7565	1.97305	1.67038	2.08844	0.414146	0.516733
2017.5	1.58651	1.6089	1.31754	0.915598	0.327235	0.227858
2017.75	1.46622	1.60541	1.47357	1.66696	0.365706	0.413304
2018	1.64486	1.81621	2.17438	2.66824	0.53777	0.658317
2018.25	1.79646	1.92277	2.28879	2.5245	0.565748	0.62329
2018.5	1.99533	2.24059	2.12674	2.20673	0.526111	0.545682
2018.75	2.0193	2.22008	1.5709	1.58357	0.389673	0.39279
2019	1.9134	1.89236	1.74247	1.33116	0.431866	0.330594
2019.25	1.60918	1.36769	1.05162	0.395294	0.261533	0.0986287
2019.5	1.51615	1.38649	1.7474	2.28358	0.433078	0.564474

## Sheet: InflationExpectation
observation_date	lrEpi_PCEcore	srEpi_PCEcore	sr_SPF (start in 1974Q3 because of missing observation - (INFPGDP1YR))	lr_SPF (PCE10)	srEpiMA_PCEcore	lrEpi_PCEcore_expost	srEpi_PCEcore_expost
1959.25	N/A	N/A	N/A	N/A	N/A	2.17733	2.1434
1959.5	N/A	N/A	N/A	N/A	N/A	2.24497	2.71269
1959.75	N/A	N/A	N/A	N/A	N/A	2.29363	2.30963
1960	N/A	N/A	N/A	N/A	N/A	2.35439	1.27357
1960.25	N/A	N/A	N/A	1.6827	N/A	2.43327	1.52961
1960.5	N/A	N/A	N/A	1.6827	N/A	2.50968	1.57094
1960.75	N/A	N/A	N/A	1.6827	N/A	2.58289	1.33009
1961	N/A	1.52629	N/A	1.6827	1.89294	2.69249	0.672832
1961.25	N/A	1.34872	N/A	1.6827	1.66939	2.80434	1.32345
1961.5	N/A	1.26161	N/A	1.6827	1.44649	2.88745	1.76166
1961.75	N/A	1.26354	N/A	1.6827	1.2998	2.93879	0.966454
1962	N/A	1.36091	N/A	1.6827	1.24892	2.97262	1.47192
1962.25	N/A	1.14287	N/A	1.6827	1.21766	3.03339	1.55871
1962.5	N/A	1.59304	N/A	1.6827	1.26921	3.06298	1.3232
1962.75	N/A	1.47309	N/A	1.6827	1.32447	3.10626	0.748784
1963	N/A	1.27307	N/A	1.6827	1.37369	3.1517	1.33918
1963.25	N/A	1.30156	N/A	1.6827	1.33905	3.1889	1.51671
1963.5	N/A	1.27203	N/A	1.6827	1.27418	3.29001	1.53366
1963.75	N/A	1.27367	N/A	1.6827	1.24184	3.38685	1.9578
1964	N/A	1.36736	N/A	1.6827	1.24477	3.4798	1.70038
1964.25	N/A	1.83707	N/A	1.6827	1.35802	3.61247	1.20085
1964.5	N/A	1.70471	N/A	1.6827	1.50437	3.83601	1.10821
1964.75	N/A	1.55094	N/A	1.6827	1.60746	4.10047	1.0164
1965	N/A	1.46688	N/A	1.6827	1.57615	4.32546	1.52361
1965.25	N/A	1.14588	N/A	1.6827	1.43789	4.48816	1.25263
1965.5	N/A	1.27811	N/A	1.6827	1.3111	4.61365	1.24872
1965.75	N/A	1.28762	N/A	1.6827	1.22356	4.73738	1.33262
1966	N/A	1.32509	N/A	1.6827	1.2249	4.87198	2.00823
1966.25	N/A	1.4306	N/A	1.6827	1.26678	4.97791	3.29532
1966.5	N/A	1.56957	N/A	1.6827	1.34408	5.01809	3.33413
1966.75	N/A	2.34692	N/A	1.6827	1.57626	5.09521	3.50232
1967	N/A	2.76796	N/A	1.6827	1.95228	5.16794	2.22632
1967.25	N/A	3.30703	N/A	1.6827	2.46517	5.28535	2.70383
1967.5	N/A	2.99054	N/A	1.6827	2.82941	5.3751	3.68528
1967.75	N/A	2.81406	N/A	1.6827	2.9759	5.45374	4.09646
1968	N/A	3.12158	N/A	1.6827	2.97412	5.49999	4.64413
1968.25	N/A	3.25232	N/A	1.6827	3.00223	5.54358	4.7368
1968.5	N/A	4.15667	N/A	1.6827	3.273	5.6019	4.53714
1968.75	N/A	4.46298	N/A	2.5154	3.67885	5.66435	4.73078
1969	N/A	4.47087	N/A	2.5154	4.10518	5.73045	4.454
1969.25	N/A	4.65159	N/A	2.5154	4.38733	5.75876	4.88326
1969.5	N/A	4.46826	N/A	2.6198	4.49099	5.86269	4.68641
1969.75	N/A	4.61301	N/A	2.6787	4.5381	5.93521	4.76849
1970	N/A	4.62927	N/A	2.6787	4.54648	6.03052	4.44304
1970.25	2.24223	4.61761	N/A	2.6787	4.57302	6.17167	4.60341
1970.5	2.30478	4.61266	N/A	2.6787	4.58703	6.28712	4.51343
1970.75	2.36942	4.5	N/A	2.8353	4.56689	6.404	5.75183
1971	2.44001	4.49416	N/A	3.0976	4.52997	6.51152	5.15348
1971.25	2.52245	4.95766	N/A	3.0976	4.57178	6.61127	4.65216
1971.5	2.61285	4.9917	N/A	3.0976	4.69234	6.68961	3.81253
1971.75	2.70482	4.89259	N/A	3.0976	4.83057	6.78466	2.30219
1972	2.7914	4.60511	N/A	3.4937	4.83487	6.91219	3.89523
1972.25	2.8595	3.12495	N/A	3.4937	4.50631	6.96556	2.73197
1972.5	2.91514	3.60646	N/A	3.4937	4.07355	7.03707	3.03928
1972.75	2.95776	2.8329	N/A	3.4937	3.54254	7.12723	2.54009
1973	2.9984	2.86308	N/A	3.9173	3.2256	7.20837	2.81119
1973.25	3.04184	3.08328	N/A	3.9173	3.02833	7.2739	5.57266
1973.5	3.07954	2.59128	N/A	3.9173	2.89798	7.21012	5.41169
1973.75	3.13455	3.77609	N/A	3.9173	3.05723	7.23064	5.68952
1974	3.20249	4.34246	N/A	3.9173	3.38682	7.16761	7.04831
1974.25	3.28188	5.21882	N/A	4.21103	4.05591	7.09302	10.3123
1974.5	3.38429	6.43627	N/A	4.88973	4.83426	6.95488	11.9372
1974.75	3.5161	7.68491	N/A	5.0722	5.78888	6.75357	10.1277
1975	3.68807	9.66715	7.6814	5.0722	6.99193	6.57185	8.05324
1975.25	3.89154	10.2735	7.2412	5.0722	8.20123	6.51004	6.23216
1975.5	4.10195	9.53423	5.5917	5.09507	9.12243	6.44101	6.1511
1975.75	4.28848	7.24164	5.9454	5.1408	9.22901	6.39091	6.67424
1976	4.44097	5.71265	6.2087	5.1408	8.55052	6.29523	6.21212
1976.25	4.57159	5.82912	6.1832	4.87883	7.52864	6.24931	4.88836
1976.5	4.68849	5.78527	5.9002	4.40287	6.67763	6.19513	6.41325
1976.75	4.78496	5.51537	6.055	4.4988	6.16282	6.10276	6.40668
1977	4.87022	5.91704	5.729	4.4988	5.93407	6.02403	6.89217
1977.25	4.94068	5.68742	5.644	4.4988	5.82761	5.91363	6.26452
1977.5	5.01378	6.0613	6.2678	4.616	5.88042	5.8549	6.82593
1977.75	5.09863	6.49033	5.8989	4.8504	6.02131	5.77453	5.93827
1978	5.18377	6.33992	5.9557	4.8504	6.21537	5.729	6.38786
1978.25	5.26258	6.08452	5.9044	5.03863	6.31949	5.66693	7.07676
1978.5	5.32382	6.00186	6.5327	5.4151	6.27557	5.6136	7.03883
1978.75	5.37757	6.47656	6.9055	5.4151	6.26285	5.55501	7.38352
1979	5.42745	6.34804	7.0927	5.65917	6.30348	5.48436	5.57859
1979.25	5.482	6.95302	7.3262	6.1473	6.49645	5.45561	9.0862
1979.5	5.53292	6.26408	7.9278	6.1473	6.56233	5.32183	7.59339
1979.75	5.59458	7.28468	8.0251	6.7167	6.76655	5.20738	8.60582
1980	5.65859	7.11707	8.1871	6.7167	6.90092	5.08612	10.1515
1980.25	5.72944	7.50325	8.6957	6.7167	7.19324	4.9526	9.2508
1980.5	5.82685	9.1714	8.8416	6.7167	7.68396	4.83715	9.21072
1980.75	5.92688	8.36325	8.934	6.7167	8.14418	4.71176	10.1118
1981	6.03727	8.90135	9.3725	7.0525	8.63442	4.54724	9.16517
1981.25	6.15043	9.2677	9.0619	7.7241	8.88607	4.41042	7.77287
1981.5	6.25372	8.66004	8.6787	7.47	9.05021	4.29528	7.57688
1981.75	6.34822	8.19703	7.8029	7.22	8.97652	4.19838	7.30462
1982	6.43749	7.84365	7.5188	7.33	8.66245	4.09653	5.99014
1982.25	6.53136	7.08844	7.0197	6.76	8.20813	4.02439	5.51536
1982.5	6.6143	6.3475	6.2378	6.36	7.62135	3.95796	6.5688
1982.75	6.69559	6.04914	5.8739	6.36557	6.98377	3.85411	5.69273
1983	6.77566	6.07025	5.5898	6.2	6.48294	3.78619	5.35507
1983.25	6.84482	5.72043	5.0012	5.92	6.10194	3.72211	3.09106
1983.5	6.91678	5.74878	4.8237	6.18	5.84727	3.72161	6.22167
1983.75	6.95717	4.9882	4.9494	6.23	5.47736	3.62305	3.23286
1984	6.98129	5.16248	5.5327	6.25	5.20639	3.59384	4.10812
1984.25	6.97178	4.31712	4.9774	6.18	4.78926	3.53636	4.76137
1984.5	6.9296	4.12301	5.3812	6.10246	4.46661	3.48555	3.81171
1984.75	6.87	4.93179	4.746	5.65	4.30509	3.44642	2.87281
1985	6.75853	3.96706	4.4131	5.3	4.14856	3.42543	5.57495
1985.25	6.61916	3.70235	3.993	4.95339	4.06214	3.33926	3.51257
1985.5	6.4827	4.37824	4.329	5.075	3.95837	3.31132	4.17076
1985.75	6.3623	4.03953	4.2132	5.295	3.94591	3.25493	2.90333
1986	6.27723	3.96009	3.9744	5.21131	3.99135	3.23268	4.39206
1986.25	6.21225	4.08934	3.3333	4.87712	3.92266	3.16233	2.77003
1986.5	6.15098	3.6727	3.1524	4.85143	3.86	3.14067	2.77298
1986.75	6.09316	3.39497	2.6155	4.71885	3.70858	3.11722	3.29387
1987	6.02535	3.0327	3.1115	4.70522	3.44212	3.09225	2.52935
1987.25	5.96149	3.18762	3.7037	4.885	3.30112	3.06829	3.93254
1987.5	5.88238	2.76941	3.9182	4.89574	3.07007	3.0225	3.62926
1987.75	5.80216	2.98821	4.142	5.08082	3.04534	2.95465	4.12943
1988	5.7247	3.51386	3.6195	4.74	3.05818	2.88315	3.91829
1988.25	5.65503	3.67103	3.761	4.835	3.2882	2.81457	4.93616
1988.5	5.59674	4.02587	3.9435	4.645	3.53661	2.72223	4.68896
1988.75	5.53968	4.30365	4.1838	4.52	3.79597	2.64103	4.54573
1989	5.48775	4.4997	4.3689	4.26685	4.07296	2.55949	4.43384
1989.25	5.42983	4.55382	4.5564	4.29	4.27108	2.48157	3.68553
1989.5	5.37979	4.61165	4.5777	4.34	4.43036	2.42189	3.01455
1989.75	5.31062	4.22332	4.3205	4.13	4.40493	2.38106	3.7095
1990	5.22816	3.66237	3.9844	3.90574	4.2119	2.33395	4.68981
1990.25	5.1336	3.50166	4.0217	3.65574	3.9107	2.27267	4.54521
1990.5	5.01406	3.6569	3.8168	3.87	3.72981	2.19159	4.10601
1990.75	4.89875	3.90848	4.384	3.98803	3.75209	2.13485	3.39932
1991	4.7807	4.17106	4.2649	3.89836	3.92913	2.09847	3.59424
1991.25	4.65217	4.08377	3.4944	3.9122	4.06081	2.06704	3.1195
1991.5	4.52269	3.81444	3.3824	3.94	4.03601	2.02727	3.65078
1991.75	4.39313	3.48846	3.3528	3.68	3.80896	1.96325	3.18819
1992	4.27026	3.38876	3.193	3.6	3.57035	1.93476	3.09109
1992.25	4.16225	3.37843	3.2498	3.3	3.40237	1.88683	2.85361
1992.5	4.06965	3.28098	3.1074	3.5	3.30824	1.8733	2.39226
1992.75	3.98866	3.23762	2.7909	3.35	3.22912	1.86398	2.963
1993	3.90592	2.93139	2.7066	3.2	3.06523	1.82526	2.7842
1993.25	3.83128	2.89112	2.7802	3.1	2.92371	1.77977	3.07118
1993.5	3.75853	2.80678	2.7558	3.3	2.77886	1.7328	2.25799
1993.75	3.70163	2.85353	3.0522	3.05	2.75342	1.71763	2.07519
1994	3.64595	2.87365	2.8332	3.05	2.73525	1.70709	1.82228
1994.25	3.59957	2.53395	2.7631	3.05	2.66975	1.72367	2.72458
1994.5	3.55476	2.25247	2.8924	3.1	2.5083	1.71473	2.25321
1994.75	3.49779	2.21334	3.0517	3.1	2.3297	1.69581	2.0409
1995	3.45514	2.26998	3.1029	3.1	2.22289	1.69932	2.11329
1995.25	3.41447	2.26241	2.8929	2.9	2.19163	1.71697	2.39889
1995.5	3.36683	2.36196	2.9362	2.95	2.21222	1.70329	1.92064
1995.75	3.3247	2.22006	2.5677	2.8	2.20674	1.69291	2.01996
1996	3.27838	2.10064	2.3505	2.6	2.17691	1.70793	1.58392
1996.25	3.23175	2.12137	2.3623	2.6	2.12159	1.72525	1.91048
1996.5	3.18891	1.93905	2.5023	2.6	2.04942	1.74932	1.84257
1996.75	3.14758	1.80865	2.505	2.6	1.96455	1.75755	2.2979
1997	3.11422	1.83288	2.565	2.6	1.87501	1.74331	1.58049
1997.25	3.08019	1.95642	2.5782	2.6	1.85146	1.77688	2.10137
1997.5	3.05739	1.86303	2.423	2.45	1.86746	1.76173	0.934318
1997.75	3.02873	1.96119	2.455	2.6	1.90545	1.78779	1.27555
1998	2.98928	1.51482	2.2968	2.25	1.84611	1.82143	1.18324
1998.25	2.93852	1.34697	2.2338	2.2	1.70335	1.84786	1.23151
1998.5	2.87691	1.37042	2.0483	2.1	1.51235	1.8654	1.42914
1998.75	2.80394	1.02245	2.0345	2.1	1.32469	1.877	1.27479
1999	2.72766	1.39869	1.8525	2.1	1.26149	1.84948	1.30664
1999.25	2.64889	1.1847	1.5446	1.9	1.23088	1.82579	1.29727
1999.5	2.56779	1.28022	1.7405	2.1	1.28173	1.8388	1.38483
1999.75	2.49459	1.29445	1.8675	2.1	1.29723	1.83981	1.81773
2000	2.43119	1.28502	1.813	2.1	1.30916	1.85724	2.21098
2000.25	2.37615	1.47038	1.9881	2.1	1.35549	1.8311	1.2808
2000.5	2.32513	1.70012	2.215	2.1	1.47046	1.82141	1.81898
2000.75	2.26886	1.61822	2.3743	2.1	1.58772	1.78913	1.936
2001	2.20867	1.77632	2.2595	2.1	1.69604	1.7681	2.32633
2001.25	2.15107	1.79039	2.1218	2.1	1.73996	1.75777	1.52433
2001.5	2.10076	1.82027	2.0696	2.1	1.79465	1.77868	1.08081
2001.75	2.06052	1.88628	2.0891	2.1	1.83373	1.80025	2.04114
2002	2.01848	1.6561	1.7377	2.15	1.80251	1.78651	1.16993
2002.25	1.97836	1.71575	1.7832	2.1	1.77048	1.82357	2.30888
2002.5	1.93419	1.39176	1.9281	2.1	1.62372	1.80736	2.01809
2002.75	1.89643	1.58038	1.8936	2.1	1.60175	1.78542	1.40917
2003	1.87208	1.911	1.9253	2.05	1.64811	1.79465	0.963228
2003.25	1.84521	1.69151	1.8409	2.1	1.7374	1.81055	1.18548
2003.5	1.81893	1.64453	1.7748	2.1	1.7455	1.81207	1.65004
2003.75	1.78443	1.37175	1.7226	2.1	1.58468	1.80964	1.65279
2004	1.74848	1.28175	1.7551	2.1	1.44551	1.81636	2.4885
2004.25	1.71945	1.38403	1.5686	2.1	1.34337	1.78723	2.36402
2004.5	1.70567	1.80413	1.8331	2.1	1.4582	1.77543	1.49506
2004.75	1.70123	2.0873	2.1528	2.1	1.69965	1.77525	2.18181
2005	1.69586	1.9171	1.9992	2.1	1.90839	1.74817	2.82452
2005.25	1.69395	2.03445	1.9775	2.05	2.03543	1.69587	1.84948
2005.5	1.6923	2.11258	2.2313	2.1	2.09324	1.69364	1.50562
2005.75	1.68949	1.93683	2.2452	2.1	2.12178	1.68797	2.62446
2006	1.68878	1.96239	2.1876	2.1	2.10793	1.64669	2.2781
2006.25	1.6909	2.12022	2.1911	2.1	2.10283	1.6349	2.87966
2006.5	1.69293	1.9406	2.2606	2.1	2.09531	1.6156	2.17242
2006.75	1.70425	2.23254	2.3919	2.1	2.1708	1.60868	1.72667
2007	1.72013	2.43724	2.2698	2.1	2.26483	1.60265	2.93001
2007.25	1.72883	2.12625	2.1312	2	2.33004	1.57373	1.49502
2007.5	1.74151	2.35517	2.2922	2	2.36432	1.57084	1.97346
2007.75	1.74456	2.03381	2.2673	2.1	2.23113	1.55618	2.62327
2008	1.75199	1.95569	2.2425	2.1	2.15492	1.54399	2.23889
2008.25	1.77118	2.20162	2.2445	2.2	2.09888	1.54849	1.93149
2008.5	1.7886	2.03942	2.3917	2.2	2.09962	1.5576	1.89203
2008.75	1.81406	2.13442	2.2277	2.2	2.15236	1.54683	0.186281
2009	1.83596	2.12257	1.9411	2.2	2.12532	1.58899	0.368408
2009.25	1.84285	1.60769	1.253	2.2	1.95415	1.60997	1.81625
2009.5	1.83743	1.12046	1.4694	2.275	1.59334	1.61826	1.42493
2009.75	1.8309	1.18383	1.4576	2.15	1.22976	1.63007	2.51708
2010	1.82178	1.06064	1.4816	2.1	1.02817	1.60083	1.16713
2010.25	1.82368	1.75274	1.5317	2.1	1.17211	1.61288	0.895888
2010.5	1.82498	1.89989	1.6558	2.15	1.39152	1.57052	0.535616
2010.75	1.82071	1.50812	1.5026	2.105	1.57355	1.64404	1.09697
2011	1.80827	1.31936	1.522	2	1.49055	1.64694	1.91195
2011.25	1.78638	0.963944	1.5032	2.1	1.22524	N/A	2.36188
2011.5	1.76837	1.27078	1.773	2.26917	1.09673	N/A	1.94141
2011.75	1.75788	1.62936	1.8874	2.25	1.16183	N/A	1.49162
2012	1.76061	1.91539	1.9302	2.155	1.45889	N/A	2.65378
2012.25	1.76513	1.90353	1.7483	2.15	1.72728	N/A	1.65946
2012.5	1.78129	2.09751	1.9376	2.2	1.93591	N/A	1.14257
2012.75	1.78833	1.83307	1.8588	2.2	1.97143	N/A	1.77736
2013	1.78469	1.67294	1.9932	2.1	1.90893	N/A	1.59633
2013.25	1.78669	1.83002	1.9263	2	1.80942	N/A	1.24569
2013.5	1.7835	1.51571	1.8684	2	1.681	N/A	1.55308
2013.75	1.78465	1.46814	1.8131	2	1.58415	N/A	1.92166
2014	1.7906	1.60894	1.8067	2	1.49763	N/A	1.32204
2014.25	1.79593	1.62104	1.8392	2	1.5092	N/A	1.89033
2014.5	1.7902	1.52344	1.8751	2	1.53223	N/A	1.48812
2014.75	1.78121	1.71991	1.966	2	1.5744	N/A	1.09969
2015	1.77276	1.65423	1.8654	2	1.59943	N/A	0.73141
2015.25	1.75601	1.43005	1.7707	2	1.57951	N/A	1.76045
2015.5	1.73356	1.32761	1.8144	1.98	1.45798	N/A	1.27949
2015.75	1.71346	1.33384	1.7656	2	1.33116	N/A	0.970825
2016	1.69202	1.2791	1.8526	1.9	1.25466	N/A	1.80473
2016.25	1.66707	1.26216	1.8085	1.97	1.21625	N/A	2.10097
2016.5	1.65208	1.56428	1.8686	2	1.2768	N/A	1.89447
2016.75	1.63288	1.56566	1.8892	2	1.38234	N/A	1.48579
2017	1.61338	1.7048	1.9402	2	1.54895	N/A	1.76465
2017.25	1.60255	1.7798	2.1025	2.1	1.66963	N/A	1.37956
2017.5	1.5875	1.69804	2.0102	2.09	1.75919	N/A	1.38609
2017.75	1.57648	1.49752	1.9432	2	1.73921	N/A	2.13184
2018	1.56356	1.42125	1.998	2	1.63516	N/A	2.42031
2018.25	1.54912	1.63715	2.0365	2	1.58727	N/A	2.29767
2018.5	1.54291	1.78108	2.1011	2	1.65199	N/A	1.46104
2018.75	1.53965	1.95864	2.2249	2	1.83352	N/A	1.86351
2019	1.53735	1.89181	2.2151	2	1.96832	N/A	1.20093
2019.25	1.54843	1.80192	2.1038	2	2.02769	N/A	2.14902
2019.5	1.56356	1.50227	2.0131	2	1.91211	N/A	1.89755
2019.75	1.57849	1.64267	1.9787	2	1.77826	N/A	1.34371
2020	1.59897	1.77375	1.9405	2	1.70211	N/A	1.64823
2020.25	1.60188	1.57561	1.9268	2.0206	1.68313	N/A	-0.77278
2020.5	1.6026	1.74475	1.3731	1.8656	1.71302	N/A	3.4877
2020.75	1.59085	1.07248	1.5176	1.8875	1.46531	N/A	1.21248
2021	1.59429	1.23788	1.872	1.952	1.38926	N/A	N/A

## Sheet: InflationExpectation_ver2
observation_date	lrEpi_PCEcore	srEpi_PCEcore	sr_SPF (start in 1974Q3 because of missing observation - (INFPGDP1YR))	lr_SPF (PCE10)	srEpiMA_PCEcore	lrEpi_PCEcore_expost	srEpi_PCEcore_expost	lrEpi_PCEcore_expost	srEpi_PCEcore_expost
1959.25	N/A	N/A	N/A	N/A	N/A	2.17733	2.1434	4.5113	N/A
1959.5	N/A	N/A	N/A	N/A	N/A	2.24497	2.71269	4.54624	N/A
1959.75	N/A	N/A	N/A	N/A	N/A	2.29363	2.30963	4.58191	N/A
1960	N/A	N/A	N/A	N/A	N/A	2.35439	1.27357	4.59091	N/A
1960.25	N/A	N/A	N/A	1.6827	N/A	2.43327	1.52961	4.58828	1.93587
1960.5	N/A	N/A	N/A	1.6827	N/A	2.50968	1.57094	4.52149	1.65641
1960.75	N/A	N/A	N/A	1.6827	N/A	2.58289	1.33009	4.48015	1.4159
1961	N/A	1.52629	N/A	1.6827	1.89294	2.69249	0.672832	4.7137	1.26716
1961.25	N/A	1.34872	N/A	1.6827	1.66939	2.80434	1.32345	4.88318	1.21635
1961.5	N/A	1.26161	N/A	1.6827	1.44649	2.88745	1.76166	4.89483	1.26325
1961.75	N/A	1.26354	N/A	1.6827	1.2998	2.93879	0.966454	4.7266	1.17337
1962	N/A	1.36091	N/A	1.6827	1.24892	2.97262	1.47192	3.8975	1.37102
1962.25	N/A	1.14287	N/A	1.6827	1.21766	3.03339	1.55871	3.59655	1.429
1962.5	N/A	1.59304	N/A	1.6827	1.26921	3.06298	1.3232	3.13358	1.32105
1962.75	N/A	1.47309	N/A	1.6827	1.32447	3.10626	0.748784	2.94667	1.2671
1963	N/A	1.27307	N/A	1.6827	1.37369	3.1517	1.33918	3.00474	1.23437
1963.25	N/A	1.30156	N/A	1.6827	1.33905	3.1889	1.51671	2.74252	1.22403
1963.5	N/A	1.27203	N/A	1.6827	1.27418	3.29001	1.53366	3.42443	1.27591
1963.75	N/A	1.27367	N/A	1.6827	1.24184	3.38685	1.9578	3.99351	1.57413
1964	N/A	1.36736	N/A	1.6827	1.24477	3.4798	1.70038	4.74981	1.66308
1964.25	N/A	1.83707	N/A	1.6827	1.35802	3.61247	1.20085	5.75946	1.58517
1964.5	N/A	1.70471	N/A	1.6827	1.50437	3.83601	1.10821	6.85737	1.48019
1964.75	N/A	1.55094	N/A	1.6827	1.60746	4.10047	1.0164	8.35897	1.24829
1965	N/A	1.46688	N/A	1.6827	1.57615	4.32546	1.52361	9.38736	1.2048
1965.25	N/A	1.14588	N/A	1.6827	1.43789	4.48816	1.25263	9.62095	1.21759
1965.5	N/A	1.27811	N/A	1.6827	1.3111	4.61365	1.24872	8.67873	1.25231
1965.75	N/A	1.28762	N/A	1.6827	1.22356	4.73738	1.33262	7.35187	1.33044
1966	N/A	1.32509	N/A	1.6827	1.2249	4.87198	2.00823	6.55534	1.4495
1966.25	N/A	1.4306	N/A	1.6827	1.26678	4.97791	3.29532	6.12569	1.94883
1966.5	N/A	1.56957	N/A	1.6827	1.34408	5.01809	3.33413	5.80743	2.45852
1966.75	N/A	2.34692	N/A	1.6827	1.57626	5.09521	3.50232	5.86909	2.98816
1967	N/A	2.76796	N/A	1.6827	1.95228	5.16794	2.22632	5.80631	3.04156
1967.25	N/A	3.30703	N/A	1.6827	2.46517	5.28535	2.70383	5.96587	2.89799
1967.5	N/A	2.99054	N/A	1.6827	2.82941	5.3751	3.68528	6.29174	2.9828
1967.75	N/A	2.81406	N/A	1.6827	2.9759	5.45374	4.09646	6.38851	3.1259
1968	N/A	3.12158	N/A	1.6827	2.97412	5.49999	4.64413	6.27821	3.71031
1968.25	N/A	3.25232	N/A	1.6827	3.00223	5.54358	4.7368	6.15999	4.20033
1968.5	N/A	4.15667	N/A	1.6827	3.273	5.6019	4.53714	6.35035	4.40489
1968.75	N/A	4.46298	N/A	2.5154	3.67885	5.66435	4.73078	6.40012	4.55677
1969	N/A	4.47087	N/A	2.5154	4.10518	5.73045	4.454	6.73888	4.5113
1969.25	N/A	4.65159	N/A	2.5154	4.38733	5.75876	4.88326	6.54798	4.54624
1969.5	N/A	4.46826	N/A	2.6198	4.49099	5.86269	4.68641	7.01279	4.58191
1969.75	N/A	4.61301	N/A	2.6787	4.5381	5.93521	4.76849	7.14198	4.59091
1970	N/A	4.62927	N/A	2.6787	4.54648	6.03052	4.44304	7.42494	4.58828
1970.25	2.24223	4.61761	N/A	2.6787	4.57302	6.17167	4.60341	8.48495	4.52149
1970.5	2.30478	4.61266	N/A	2.6787	4.58703	6.28712	4.51343	8.52265	4.48015
1970.75	2.36942	4.5	N/A	2.8353	4.56689	6.404	5.75183	8.89565	4.7137
1971	2.44001	4.49416	N/A	3.0976	4.52997	6.51152	5.15348	9.23992	4.88318
1971.25	2.52245	4.95766	N/A	3.0976	4.57178	6.61127	4.65216	9.01507	4.89483
1971.5	2.61285	4.9917	N/A	3.0976	4.69234	6.68961	3.81253	8.67456	4.7266
1971.75	2.70482	4.89259	N/A	3.0976	4.83057	6.78466	2.30219	8.29772	3.8975
1972	2.7914	4.60511	N/A	3.4937	4.83487	6.91219	3.89523	7.65212	3.59655
1972.25	2.8595	3.12495	N/A	3.4937	4.50631	6.96556	2.73197	6.91422	3.13358
1972.5	2.91514	3.60646	N/A	3.4937	4.07355	7.03707	3.03928	6.38498	2.94667
1972.75	2.95776	2.8329	N/A	3.4937	3.54254	7.12723	2.54009	6.14961	3.00474
1973	2.9984	2.86308	N/A	3.9173	3.2256	7.20837	2.81119	5.77122	2.74252
1973.25	3.04184	3.08328	N/A	3.9173	3.02833	7.2739	5.57266	5.62097	3.42443
1973.5	3.07954	2.59128	N/A	3.9173	2.89798	7.21012	5.41169	5.03988	3.99351
1973.75	3.13455	3.77609	N/A	3.9173	3.05723	7.23064	5.68952	4.95831	4.74981
1974	3.20249	4.34246	N/A	3.9173	3.38682	7.16761	7.04831	4.36959	5.75946
1974.25	3.28188	5.21882	N/A	4.21103	4.05591	7.09302	10.3123	4.07193	6.85737
1974.5	3.38429	6.43627	N/A	4.88973	4.83426	6.95488	11.9372	4.47374	8.35897
1974.75	3.5161	7.68491	N/A	5.0722	5.78888	6.75357	10.1277	3.90001	9.38736
1975	3.68807	9.66715	7.6814	5.0722	6.99193	6.57185	8.05324	3.81266	9.62095
1975.25	3.89154	10.2735	7.2412	5.0722	8.20123	6.51004	6.23216	4.16244	8.67873
1975.5	4.10195	9.53423	5.5917	5.09507	9.12243	6.44101	6.1511	3.86264	7.35187
1975.75	4.28848	7.24164	5.9454	5.1408	9.22901	6.39091	6.67424	3.94896	6.55534
1976	4.44097	5.71265	6.2087	5.1408	8.55052	6.29523	6.21212	3.95637	6.12569
1976.25	4.57159	5.82912	6.1832	4.87883	7.52864	6.24931	4.88836	3.67468	5.80743
1976.5	4.68849	5.78527	5.9002	4.40287	6.67763	6.19513	6.41325	3.4947	5.86909
1976.75	4.78496	5.51537	6.055	4.4988	6.16282	6.10276	6.40668	3.15697	5.80631
1977	4.87022	5.91704	5.729	4.4988	5.93407	6.02403	6.89217	3.25168	5.96587
1977.25	4.94068	5.68742	5.644	4.4988	5.82761	5.91363	6.26452	2.80156	6.29174
1977.5	5.01378	6.0613	6.2678	4.616	5.88042	5.8549	6.82593	3.08277	6.38851
1977.75	5.09863	6.49033	5.8989	4.8504	6.02131	5.77453	5.93827	3.2902	6.27821
1978	5.18377	6.33992	5.9557	4.8504	6.21537	5.729	6.38786	3.49162	6.15999
1978.25	5.26258	6.08452	5.9044	5.03863	6.31949	5.66693	7.07676	3.82801	6.35035
1978.5	5.32382	6.00186	6.5327	5.4151	6.27557	5.6136	7.03883	4.06827	6.40012
1978.75	5.37757	6.47656	6.9055	5.4151	6.26285	5.55501	7.38352	4.32261	6.73888
1979	5.42745	6.34804	7.0927	5.65917	6.30348	5.48436	5.57859	4.42236	6.54798
1979.25	5.482	6.95302	7.3262	6.1473	6.49645	5.45561	9.0862	4.54609	7.01279
1979.5	5.53292	6.26408	7.9278	6.1473	6.56233	5.32183	7.59339	4.24635	7.14198
1979.75	5.59458	7.28468	8.0251	6.7167	6.76655	5.20738	8.60582	3.84326	7.42494
1980	5.65859	7.11707	8.1871	6.7167	6.90092	5.08612	10.1515	3.64249	8.48495
1980.25	5.72944	7.50325	8.6957	6.7167	7.19324	4.9526	9.2508	3.70369	8.52265
1980.5	5.82685	9.1714	8.8416	6.7167	7.68396	4.83715	9.21072	3.91011	8.89565
1980.75	5.92688	8.36325	8.934	6.7167	8.14418	4.71176	10.1118	4.1736	9.23992
1981	6.03727	8.90135	9.3725	7.0525	8.63442	4.54724	9.16517	4.09872	9.01507
1981.25	6.15043	9.2677	9.0619	7.7241	8.88607	4.41042	7.77287	3.83572	8.67456
1981.5	6.25372	8.66004	8.6787	7.47	9.05021	4.29528	7.57688	3.49244	8.29772
1981.75	6.34822	8.19703	7.8029	7.22	8.97652	4.19838	7.30462	3.38288	7.65212
1982	6.43749	7.84365	7.5188	7.33	8.66245	4.09653	5.99014	3.33178	6.91422
1982.25	6.53136	7.08844	7.0197	6.76	8.20813	4.02439	5.51536	3.21006	6.38498
1982.5	6.6143	6.3475	6.2378	6.36	7.62135	3.95796	6.5688	3.14552	6.14961
1982.75	6.69559	6.04914	5.8739	6.36557	6.98377	3.85411	5.69273	2.84011	5.77122
1983	6.77566	6.07025	5.5898	6.2	6.48294	3.78619	5.35507	2.78549	5.62097
1983.25	6.84482	5.72043	5.0012	5.92	6.10194	3.72211	3.09106	2.71096	5.03988
1983.5	6.91678	5.74878	4.8237	6.18	5.84727	3.72161	6.22167	2.76379	4.95831
1983.75	6.95717	4.9882	4.9494	6.23	5.47736	3.62305	3.23286	2.73098	4.36959
1984	6.98129	5.16248	5.5327	6.25	5.20639	3.59384	4.10812	2.51449	4.07193
1984.25	6.97178	4.31712	4.9774	6.18	4.78926	3.53636	4.76137	2.27942	4.47374
1984.5	6.9296	4.12301	5.3812	6.10246	4.46661	3.48555	3.81171	2.19521	3.90001
1984.75	6.87	4.93179	4.746	5.65	4.30509	3.44642	2.87281	2.19404	3.81266
1985	6.75853	3.96706	4.4131	5.3	4.14856	3.42543	5.57495	2.18564	4.16244
1985.25	6.61916	3.70235	3.993	4.95339	4.06214	3.33926	3.51257	2.25699	3.86264
1985.5	6.4827	4.37824	4.329	5.075	3.95837	3.31132	4.17076	2.1776	3.94896
1985.75	6.3623	4.03953	4.2132	5.295	3.94591	3.25493	2.90333	2.09616	3.95637
1986	6.27723	3.96009	3.9744	5.21131	3.99135	3.23268	4.39206	2.09102	3.67468
1986.25	6.21225	4.08934	3.3333	4.87712	3.92266	3.16233	2.77003	1.96108	3.4947
1986.5	6.15098	3.6727	3.1524	4.85143	3.86	3.14067	2.77298	1.84156	3.15697
1986.75	6.09316	3.39497	2.6155	4.71885	3.70858	3.11722	3.29387	1.8224	3.25168
1987	6.02535	3.0327	3.1115	4.70522	3.44212	3.09225	2.52935	1.89042	2.80156
1987.25	5.96149	3.18762	3.7037	4.885	3.30112	3.06829	3.93254	1.88957	3.08277
1987.5	5.88238	2.76941	3.9182	4.89574	3.07007	3.0225	3.62926	1.93636	3.2902
1987.75	5.80216	2.98821	4.142	5.08082	3.04534	2.95465	4.12943	1.7124	3.49162
1988	5.7247	3.51386	3.6195	4.74	3.05818	2.88315	3.91829	1.4613	3.82801
1988.25	5.65503	3.67103	3.761	4.835	3.2882	2.81457	4.93616	1.36334	4.06827
1988.5	5.59674	4.02587	3.9435	4.645	3.53661	2.72223	4.68896	1.14944	4.32261
1988.75	5.53968	4.30365	4.1838	4.52	3.79597	2.64103	4.54573	1.2717	4.42236
1989	5.48775	4.4997	4.3689	4.26685	4.07296	2.55949	4.43384	1.27151	4.54609
1989.25	5.42983	4.55382	4.5564	4.29	4.27108	2.48157	3.68553	1.30198	4.24635
1989.5	5.37979	4.61165	4.5777	4.34	4.43036	2.42189	3.01455	1.31821	3.84326
1989.75	5.31062	4.22332	4.3205	4.13	4.40493	2.38106	3.7095	1.30729	3.64249
1990	5.22816	3.66237	3.9844	3.90574	4.2119	2.33395	4.68981	1.44096	3.70369
1990.25	5.1336	3.50166	4.0217	3.65574	3.9107	2.27267	4.54521	1.66314	3.91011
1990.5	5.01406	3.6569	3.8168	3.87	3.72981	2.19159	4.10601	1.65907	4.1736
1990.75	4.89875	3.90848	4.384	3.98803	3.75209	2.13485	3.39932	1.7659	4.09872
1991	4.7807	4.17106	4.2649	3.89836	3.92913	2.09847	3.59424	1.79492	3.83572
1991.25	4.65217	4.08377	3.4944	3.9122	4.06081	2.06704	3.1195	1.82312	3.49244
1991.5	4.52269	3.81444	3.3824	3.94	4.03601	2.02727	3.65078	1.88316	3.38288
1991.75	4.39313	3.48846	3.3528	3.68	3.80896	1.96325	3.18819	1.70126	3.33178
1992	4.27026	3.38876	3.193	3.6	3.57035	1.93476	3.09109	1.72703	3.21006
1992.25	4.16225	3.37843	3.2498	3.3	3.40237	1.88683	2.85361	1.44289	3.14552
1992.5	4.06965	3.28098	3.1074	3.5	3.30824	1.8733	2.39226	1.63534	2.84011
1992.75	3.98866	3.23762	2.7909	3.35	3.22912	1.86398	2.963	1.86609	2.78549
1993	3.90592	2.93139	2.7066	3.2	3.06523	1.82526	2.7842	1.71077	2.71096
1993.25	3.83128	2.89112	2.7802	3.1	2.92371	1.77977	3.07118	1.65965	2.76379
1993.5	3.75853	2.80678	2.7558	3.3	2.77886	1.7328	2.25799	1.38362	2.73098
1993.75	3.70163	2.85353	3.0522	3.05	2.75342	1.71763	2.07519	1.29326	2.51449
1994	3.64595	2.87365	2.8332	3.05	2.73525	1.70709	1.82228	1.35325	2.27942
1994.25	3.59957	2.53395	2.7631	3.05	2.66975	1.72367	2.72458	1.7281	2.19521
1994.5	3.55476	2.25247	2.8924	3.1	2.5083	1.71473	2.25321	2.0176	2.19404
1994.75	3.49779	2.21334	3.0517	3.1	2.3297	1.69581	2.0409	1.97946	2.18564
1995	3.45514	2.26998	3.1029	3.1	2.22289	1.69932	2.11329	2.10922	2.25699
1995.25	3.41447	2.26241	2.8929	2.9	2.19163	1.71697	2.39889	2.19105	2.1776
1995.5	3.36683	2.36196	2.9362	2.95	2.21222	1.70329	1.92064	2.06507	2.09616
1995.75	3.3247	2.22006	2.5677	2.8	2.20674	1.69291	2.01996	2.06767	2.09102
1996	3.27838	2.10064	2.3505	2.6	2.17691	1.70793	1.58392	2.17574	1.96108
1996.25	3.23175	2.12137	2.3623	2.6	2.12159	1.72525	1.91048	2.04253	1.84156
1996.5	3.18891	1.93905	2.5023	2.6	2.04942	1.74932	1.84257	2.29413	1.8224
1996.75	3.14758	1.80865	2.505	2.6	1.96455	1.75755	2.2979	2.45782	1.89042
1997	3.11422	1.83288	2.565	2.6	1.87501	1.74331	1.58049	2.23815	1.88957
1997.25	3.08019	1.95642	2.5782	2.6	1.85146	1.77688	2.10137	2.397	1.93636
1997.5	3.05739	1.86303	2.423	2.45	1.86746	1.76173	0.934318	2.05824	1.7124
1997.75	3.02873	1.96119	2.455	2.6	1.90545	1.78779	1.27555	2.00951	1.4613
1998	2.98928	1.51482	2.2968	2.25	1.84611	1.82143	1.18324	2.22889	1.36334
1998.25	2.93852	1.34697	2.2338	2.2	1.70335	1.84786	1.23151	2.06046	1.14944
1998.5	2.87691	1.37042	2.0483	2.1	1.51235	1.8654	1.42914	2.16774	1.2717
1998.75	2.80394	1.02245	2.0345	2.1	1.32469	1.877	1.27479	2.14777	1.27151
1999	2.72766	1.39869	1.8525	2.1	1.26149	1.84948	1.30664	1.54693	1.30198
1999.25	2.64889	1.1847	1.5446	1.9	1.23088	1.82579	1.29727	1.08532	1.31821
1999.5	2.56779	1.28022	1.7405	2.1	1.28173	1.8388	1.38483	1.05704	1.30729
1999.75	2.49459	1.29445	1.8675	2.1	1.29723	1.83981	1.81773	0.942167	1.44096
2000	2.43119	1.28502	1.813	2.1	1.30916	1.85724	2.21098	1.51712	1.66314
2000.25	2.37615	1.47038	1.9881	2.1	1.35549	1.8311	1.2808	1.71528	1.65907
2000.5	2.32513	1.70012	2.215	2.1	1.47046	1.82141	1.81898	1.48827	1.7659
2000.75	2.26886	1.61822	2.3743	2.1	1.58772	1.78913	1.936	1.26809	1.79492
2001	2.20867	1.77632	2.2595	2.1	1.69604	1.7681	2.32633	0.919363	1.82312
2001.25	2.15107	1.79039	2.1218	2.1	1.73996	1.75777	1.52433	1.10275	1.88316
2001.5	2.10076	1.82027	2.0696	2.1	1.79465	1.77868	1.08081	1.46338	1.70126
2001.75	2.06052	1.88628	2.0891	2.1	1.83373	1.80025	2.04114	1.81053	1.72703
2002	2.01848	1.6561	1.7377	2.15	1.80251	1.78651	1.16993	1.90793	1.44289
2002.25	1.97836	1.71575	1.7832	2.1	1.77048	1.82357	2.30888	2.08925	1.63534
2002.5	1.93419	1.39176	1.9281	2.1	1.62372	1.80736	2.01809	1.91711	1.86609
2002.75	1.89643	1.58038	1.8936	2.1	1.60175	1.78542	1.40917	1.72043	1.71077
2003	1.87208	1.911	1.9253	2.05	1.64811	1.79465	0.963228	1.79072	1.65965
2003.25	1.84521	1.69151	1.8409	2.1	1.7374	1.81055	1.18548	1.53185	1.38362
2003.5	1.81893	1.64453	1.7748	2.1	1.7455	1.81207	1.65004	1.42989	1.29326
2003.75	1.78443	1.37175	1.7226	2.1	1.58468	1.80964	1.65279	1.53115	1.35325
2004	1.74848	1.28175	1.7551	2.1	1.44551	1.81636	2.4885	1.56657	1.7281
2004.25	1.71945	1.38403	1.5686	2.1	1.34337	1.78723	2.36402	1.49898	2.0176
2004.5	1.70567	1.80413	1.8331	2.1	1.4582	1.77543	1.49506	1.65766	1.97946
2004.75	1.70123	2.0873	2.1528	2.1	1.69965	1.77525	2.18181	1.64166	2.10922
2005	1.69586	1.9171	1.9992	2.1	1.90839	1.74817	2.82452	1.43922	2.19105
2005.25	1.69395	2.03445	1.9775	2.05	2.03543	1.69587	1.84948	1.29307	2.06507
2005.5	1.6923	2.11258	2.2313	2.1	2.09324	1.69364	1.50562	1.26118	2.06767
2005.75	1.68949	1.93683	2.2452	2.1	2.12178	1.68797	2.62446	1.20973	2.17574
2006	1.68878	1.96239	2.1876	2.1	2.10793	1.64669	2.2781	1.17785	2.04253
2006.25	1.6909	2.12022	2.1911	2.1	2.10283	1.6349	2.87966	1.44282	2.29413
2006.5	1.69293	1.9406	2.2606	2.1	2.09531	1.6156	2.17242	1.52634	2.45782
2006.75	1.70425	2.23254	2.3919	2.1	2.1708	1.60868	1.72667	1.67768	2.23815
2007	1.72013	2.43724	2.2698	2.1	2.26483	1.60265	2.93001	1.80486	2.397
2007.25	1.72883	2.12625	2.1312	2	2.33004	1.57373	1.49502	1.79502	2.05824
2007.5	1.74151	2.35517	2.2922	2	2.36432	1.57084	1.97346	1.61775	2.00951
2007.75	1.74456	2.03381	2.2673	2.1	2.23113	1.55618	2.62327	1.4927	2.22889
2008	1.75199	1.95569	2.2425	2.1	2.15492	1.54399	2.23889	1.65135	2.06046
2008.25	1.77118	2.20162	2.2445	2.2	2.09888	1.54849	1.93149	1.81191	2.16774
2008.5	1.7886	2.03942	2.3917	2.2	2.09962	1.5576	1.89203	2.03729	2.14777
2008.75	1.81406	2.13442	2.2277	2.2	2.15236	1.54683	0.186281	2.05577	1.54693
2009	1.83596	2.12257	1.9411	2.2	2.12532	1.58899	0.368408	1.99	1.08532
2009.25	1.84285	1.60769	1.253	2.2	1.95415	1.60997	1.81625	1.69057	1.05704
2009.5	1.83743	1.12046	1.4694	2.275	1.59334	1.61826	1.42493	1.65421	0.942167
2009.75	1.8309	1.18383	1.4576	2.15	1.22976	1.63007	2.51708	1.76154	1.51712
2010	1.82178	1.06064	1.4816	2.1	1.02817	1.60083	1.16713	1.63364	1.71528
2010.25	1.82368	1.75274	1.5317	2.1	1.17211	1.61288	0.895888	1.74389	1.48827
2010.5	1.82498	1.89989	1.6558	2.15	1.39152	1.57052	0.535616	1.01839	1.26809
2010.75	1.82071	1.50812	1.5026	2.105	1.57355	1.64404	1.09697	1.40551	0.919363
2011	1.80827	1.31936	1.522	2	1.49055	1.64694	1.91195	1.37311	1.10275
2011.25	1.78638	0.963944	1.5032	2.1	1.22524	N/A	2.36188	N/A	1.46338
2011.5	1.76837	1.27078	1.773	2.26917	1.09673	N/A	1.94141	N/A	1.81053
2011.75	1.75788	1.62936	1.8874	2.25	1.16183	N/A	1.49162	N/A	1.90793
2012	1.76061	1.91539	1.9302	2.155	1.45889	N/A	2.65378	N/A	2.08925
2012.25	1.76513	1.90353	1.7483	2.15	1.72728	N/A	1.65946	N/A	1.91711
2012.5	1.78129	2.09751	1.9376	2.2	1.93591	N/A	1.14257	N/A	1.72043
2012.75	1.78833	1.83307	1.8588	2.2	1.97143	N/A	1.77736	N/A	1.79072
2013	1.78469	1.67294	1.9932	2.1	1.90893	N/A	1.59633	N/A	1.53185
2013.25	1.78669	1.83002	1.9263	2	1.80942	N/A	1.24569	N/A	1.42989
2013.5	1.7835	1.51571	1.8684	2	1.681	N/A	1.55308	N/A	1.53115
2013.75	1.78465	1.46814	1.8131	2	1.58415	N/A	1.92166	N/A	1.56657
2014	1.7906	1.60894	1.8067	2	1.49763	N/A	1.32204	N/A	1.49898
2014.25	1.79593	1.62104	1.8392	2	1.5092	N/A	1.89033	N/A	1.65766
2014.5	1.7902	1.52344	1.8751	2	1.53223	N/A	1.48812	N/A	1.64166
2014.75	1.78121	1.71991	1.966	2	1.5744	N/A	1.09969	N/A	1.43922
2015	1.77276	1.65423	1.8654	2	1.59943	N/A	0.73141	N/A	1.29307
2015.25	1.75601	1.43005	1.7707	2	1.57951	N/A	1.76045	N/A	1.26118
2015.5	1.73356	1.32761	1.8144	1.98	1.45798	N/A	1.27949	N/A	1.20973
2015.75	1.71346	1.33384	1.7656	2	1.33116	N/A	0.970825	N/A	1.17785
2016	1.69202	1.2791	1.8526	1.9	1.25466	N/A	1.80473	N/A	1.44282
2016.25	1.66707	1.26216	1.8085	1.97	1.21625	N/A	2.10097	N/A	1.52634
2016.5	1.65208	1.56428	1.8686	2	1.2768	N/A	1.89447	N/A	1.67768
2016.75	1.63288	1.56566	1.8892	2	1.38234	N/A	1.48579	N/A	1.80486
2017	1.61338	1.7048	1.9402	2	1.54895	N/A	1.76465	N/A	1.79502
2017.25	1.60255	1.7798	2.1025	2.1	1.66963	N/A	1.37956	N/A	1.61775
2017.5	1.5875	1.69804	2.0102	2.09	1.75919	N/A	1.38609	N/A	1.4927
2017.75	1.57648	1.49752	1.9432	2	1.73921	N/A	2.13184	N/A	1.65135
2018	1.56356	1.42125	1.998	2	1.63516	N/A	2.42031	N/A	1.81191
2018.25	1.54912	1.63715	2.0365	2	1.58727	N/A	2.29767	N/A	2.03729
2018.5	1.54291	1.78108	2.1011	2	1.65199	N/A	1.46104	N/A	2.05577
2018.75	1.53965	1.95864	2.2249	2	1.83352	N/A	1.86351	N/A	1.99
2019	1.53735	1.89181	2.2151	2	1.96832	N/A	1.20093	N/A	1.69057
2019.25	1.54843	1.80192	2.1038	2	2.02769	N/A	2.14902	N/A	1.65421
2019.5	1.56356	1.50227	2.0131	2	1.91211	N/A	1.89755	N/A	1.76154
2019.75	1.57849	1.64267	1.9787	2	1.77826	N/A	1.34371	N/A	1.63364
2020	1.59897	1.77375	1.9405	2	1.70211	N/A	1.64823	N/A	1.74389
2020.25	1.60188	1.57561	1.9268	2.0206	1.68313	N/A	-0.77278	N/A	1.01839
2020.5	1.6026	1.74475	1.3731	1.8656	1.71302	N/A	3.4877	N/A	1.40551
2020.75	1.59085	1.07248	1.5176	1.8875	1.46531	N/A	1.21248	N/A	1.37311
2021	1.59429	1.23788	1.872	1.952	1.38926	N/A	N/A	N/A	N/A

## Sheet: FedCleveland
observation_date	shortrate_FEDC	longrate_FEDC	riskprem_FEDC
1959.25	N/A	N/A	N/A
1959.5	N/A	N/A	N/A
1959.75	N/A	N/A	N/A
1960	N/A	N/A	N/A
1960.25	N/A	N/A	N/A
1960.5	N/A	N/A	N/A
1960.75	N/A	N/A	N/A
1961	N/A	N/A	N/A
1961.25	N/A	N/A	N/A
1961.5	N/A	N/A	N/A
1961.75	N/A	N/A	N/A
1962	N/A	N/A	N/A
1962.25	N/A	N/A	N/A
1962.5	N/A	N/A	N/A
1962.75	N/A	N/A	N/A
1963	N/A	N/A	N/A
1963.25	N/A	N/A	N/A
1963.5	N/A	N/A	N/A
1963.75	N/A	N/A	N/A
1964	N/A	N/A	N/A
1964.25	N/A	N/A	N/A
1964.5	N/A	N/A	N/A
1964.75	N/A	N/A	N/A
1965	N/A	N/A	N/A
1965.25	N/A	N/A	N/A
1965.5	N/A	N/A	N/A
1965.75	N/A	N/A	N/A
1966	N/A	N/A	N/A
1966.25	N/A	N/A	N/A
1966.5	N/A	N/A	N/A
1966.75	N/A	N/A	N/A
1967	N/A	N/A	N/A
1967.25	N/A	N/A	N/A
1967.5	N/A	N/A	N/A
1967.75	N/A	N/A	N/A
1968	N/A	N/A	N/A
1968.25	N/A	N/A	N/A
1968.5	N/A	N/A	N/A
1968.75	N/A	N/A	N/A
1969	N/A	N/A	N/A
1969.25	N/A	N/A	N/A
1969.5	N/A	N/A	N/A
1969.75	N/A	N/A	N/A
1970	N/A	N/A	N/A
1970.25	N/A	N/A	N/A
1970.5	N/A	N/A	N/A
1970.75	N/A	N/A	N/A
1971	N/A	N/A	N/A
1971.25	N/A	N/A	N/A
1971.5	N/A	N/A	N/A
1971.75	N/A	N/A	N/A
1972	N/A	N/A	N/A
1972.25	N/A	N/A	N/A
1972.5	N/A	N/A	N/A
1972.75	N/A	N/A	N/A
1973	N/A	N/A	N/A
1973.25	N/A	N/A	N/A
1973.5	N/A	N/A	N/A
1973.75	N/A	N/A	N/A
1974	N/A	N/A	N/A
1974.25	N/A	N/A	N/A
1974.5	N/A	N/A	N/A
1974.75	N/A	N/A	N/A
1975	N/A	N/A	N/A
1975.25	N/A	N/A	N/A
1975.5	N/A	N/A	N/A
1975.75	N/A	N/A	N/A
1976	N/A	N/A	N/A
1976.25	N/A	N/A	N/A
1976.5	N/A	N/A	N/A
1976.75	N/A	N/A	N/A
1977	N/A	N/A	N/A
1977.25	N/A	N/A	N/A
1977.5	N/A	N/A	N/A
1977.75	N/A	N/A	N/A
1978	N/A	N/A	N/A
1978.25	N/A	N/A	N/A
1978.5	N/A	N/A	N/A
1978.75	N/A	N/A	N/A
1979	N/A	N/A	N/A
1979.25	N/A	N/A	N/A
1979.5	N/A	N/A	N/A
1979.75	N/A	N/A	N/A
1980	N/A	N/A	N/A
1980.25	N/A	N/A	N/A
1980.5	N/A	N/A	N/A
1980.75	N/A	N/A	N/A
1981	N/A	N/A	N/A
1981.25	N/A	N/A	N/A
1981.5	N/A	N/A	N/A
1981.75	N/A	N/A	N/A
1982	N/A	N/A	N/A
1982.25	5.01327	7.46979	1.21146
1982.5	9.40122	7.35792	1.1855
1982.75	3.24016	6.982	1.17448
1983	4.58728	5.92904	1.17372
1983.25	5.00594	5.65964	1.24482
1983.5	5.86435	5.63736	1.24639
1983.75	4.92722	6.14768	1.38888
1984	3.88611	6.10835	1.34657
1984.25	5.06106	6.25963	1.3111
1984.5	4.80655	6.94199	1.44804
1984.75	6.0924	7.09765	1.42003
1985	5.57774	6.25032	1.23058
1985.25	3.7906	6.18718	1.2277
1985.5	3.79698	5.76163	1.21531
1985.75	3.80382	5.44911	1.27121
1986	4.28744	5.24365	1.21025
1986.25	4.25112	4.46008	1.14379
1986.5	6.05555	4.19313	1.19623
1986.75	3.46478	3.82178	1.24809
1987	2.35633	3.71823	1.25962
1987.25	2.62806	3.57931	1.19858
1987.5	1.61515	4.15078	1.36617
1987.75	1.15048	4.45399	1.386
1988	0.856456	4.68798	1.36253
1988.25	1.44541	4.24883	1.24013
1988.5	2.42009	4.52124	1.31681
1988.75	2.45471	4.56199	1.29808
1989	2.64085	4.47955	1.27537
1989.25	2.65759	4.85627	1.34378
1989.5	4.22765	4.63729	1.24549
1989.75	4.07636	4.00637	1.22632
1990	4.12475	4.11899	1.31216
1990.25	4.14329	4.34884	1.28827
1990.5	4.32063	4.57994	1.32589
1990.75	3.55566	4.3037	1.24401
1991	0.912416	4.0511	1.20624
1991.25	2.02738	4.00194	1.19353
1991.5	2.73034	4.1158	1.23221
1991.75	2.27403	4.08022	1.22638
1992	1.271	3.53775	1.14611
1992.25	0.508013	3.4957	1.2459
1992.5	0.428842	3.70154	1.28397
1992.75	0.133667	3.14509	1.1764
1993	0.00385845	3.18745	1.3367
1993.25	-0.0661393	2.98204	1.29743
1993.5	0.174163	2.73349	1.2308
1993.75	0.239909	2.58176	1.20507
1994	0.159313	2.56042	1.2101
1994.25	-0.230665	2.78802	1.26842
1994.5	0.643107	3.62578	1.48409
1994.75	1.2154	3.66794	1.38634
1995	1.35708	4.05894	1.42398
1995.25	1.67623	4.00676	1.33999
1995.5	2.77824	3.32671	1.20428
1995.75	2.20058	3.03471	1.23156
1996	3.03008	2.87204	1.20091
1996.25	2.82142	2.71425	1.16836
1996.5	2.35742	3.30248	1.32313
1996.75	2.76294	3.4065	1.3125
1997	2.39579	3.13698	1.23364
1997.25	1.99571	3.25893	1.2926
1997.5	2.44108	3.42219	1.30416
1997.75	2.83639	3.14642	1.22406
1998	2.50334	2.9698	1.19495
1998.25	3.15142	2.82329	1.18212
1998.5	3.36685	2.87004	1.20394
1998.75	2.82561	2.6821	1.18102
1999	2.41089	2.12859	1.24069
1999.25	2.5181	2.46203	1.31978
1999.5	3.53131	2.83286	1.34159
1999.75	3.06091	3.09219	1.34381
2000	2.106	3.16079	1.31239
2000.25	2.9065	3.45491	1.3217
2000.5	2.13845	3.23046	1.24078
2000.75	3.51847	2.99799	1.18707
2001	3.23218	2.78299	1.17611
2001.25	3.79225	2.26191	1.13813
2001.5	1.70231	2.39362	1.1964
2001.75	1.05249	2.34683	1.19548
2002	0.554338	1.94742	1.15958
2002.25	0.87028	2.44829	1.31947
2002.5	-0.22407	2.45718	1.2919
2002.75	-0.209437	1.77677	1.18454
2003	-0.538541	1.45218	1.19652
2003.25	-0.486386	1.39272	1.17535
2003.5	-0.61777	1.19515	1.18766
2003.75	-0.111422	1.59254	1.33246
2004	-0.72687	1.60276	1.35052
2004.25	-0.508528	1.58123	1.27571
2004.5	-1.40805	1.72932	1.32552
2004.75	-1.609	1.7581	1.29797
2005	0.314943	1.73478	1.24723
2005.25	0.397749	1.85726	1.26155
2005.5	0.255519	1.82576	1.23442
2005.75	1.95872	1.85464	1.17766
2006	1.02537	2.02036	1.24666
2006.25	3.83422	2.21763	1.26645
2006.5	2.51048	2.40519	1.28672
2006.75	2.85438	2.33356	1.23646
2007	5.28143	2.17803	1.18732
2007.25	2.88298	2.1534	1.21111
2007.5	1.60767	2.11855	1.22933
2007.75	2.41538	2.15123	1.23901
2008	2.13917	1.73411	1.14554
2008.25	0.415766	1.17861	1.11697
2008.5	-0.944844	1.31699	1.19564
2008.75	-2.36205	1.34722	1.18504
2009	3.99001	1.36402	1.20772
2009.25	5.1111	1.0762	1.1593
2009.5	0.765815	1.01745	1.19894
2009.75	-1.69097	1.12506	1.21649
2010	-1.55586	0.968864	1.1786
2010.25	-1.82109	1.14039	1.28675
2010.5	-0.533079	1.18495	1.27466
2010.75	0.272231	0.69333	1.16581
2011	-1.14907	0.457968	1.1506
2011.25	-1.91844	0.855838	1.25339
2011.5	-2.79508	0.727082	1.20173
2011.75	-1.73864	0.394622	1.16943
2012	-1.8986	0.1267	1.16232
2012.25	-1.52141	0.112396	1.17163
2012.5	-1.02857	0.0197576	1.16981
2012.75	-1.52416	-0.0947226	1.14919
2013	-2.28126	-0.0904289	1.16584
2013.25	-0.323007	0.102281	1.19171
2013.5	-0.750611	0.0613635	1.1922
2013.75	-1.62301	0.520761	1.2951
2014	-1.49029	0.466969	1.25496
2014.25	-1.17892	0.589922	1.26125
2014.5	-1.59023	0.651202	1.24911
2014.75	-2.26634	0.607087	1.22404
2015	-1.35274	0.599663	1.19622
2015.25	2.49919	0.666676	1.20048
2015.5	-1.22344	0.499341	1.20257
2015.75	-1.81271	0.575947	1.22197
2016	-0.513984	0.614133	1.21343
2016.25	0.308195	0.608217	1.21025
2016.5	-0.832111	0.426007	1.16328
2016.75	-2.00377	0.202753	1.16439
2017	-2.55567	0.445621	1.23922
2017.25	-1.19576	0.805512	1.28983
2017.5	0.447113	0.759425	1.23872
2017.75	-0.639841	0.653696	1.20673
2018	-1.98149	0.684794	1.20552
2018.25	-0.295638	0.997264	1.24673
2018.5	0.496996	1.15872	1.25977
2018.75	-0.555144	1.18087	1.25821
2019	0.255725	1.28792	1.26169
2019.25	1.59889	0.875275	1.14697
2019.5	0.357784	0.460678	1.10872
2019.75	0.510572	0.36521	1.15177
2020	-0.0651414	0.438734	1.20113
2020.25	0.699916	0.231082	1.14355
2020.5	3.83613	-0.0977168	1.05804
2020.75	-1.3908	-0.365272	1.07839
2021	-1.54359	-0.246005	1.1554

## Sheet: InterestRate
observation_date	GS10	TB3MS	FEDFUNDS
1959.25	3.99	2.77333	2.57
1959.5	4.25667	3	3.08333
1959.75	4.50333	3.54	3.57667
1960	4.58333	4.23	3.99
1960.25	4.48667	3.87333	3.93333
1960.5	4.26	2.99333	3.69667
1960.75	3.83333	2.36	2.93667
1961	3.88667	2.30667	2.29667
1961.25	3.78667	2.35	2.00333
1961.5	3.79	2.30333	1.73333
1961.75	3.98	2.30333	1.68333
1962	3.97333	2.46	2.4
1962.25	4.01667	2.72333	2.45667
1962.5	3.87333	2.71667	2.60667
1962.75	3.99	2.84	2.84667
1963	3.90333	2.81333	2.92333
1963.25	3.89333	2.90667	2.96667
1963.5	3.96333	2.94	2.96333
1963.75	4.03333	3.29333	3.33
1964	4.12	3.49667	3.45333
1964.25	4.18	3.53	3.46333
1964.5	4.2	3.47667	3.49
1964.75	4.19333	3.49667	3.45667
1965	4.17333	3.68333	3.57667
1965.25	4.20333	3.89	3.97333
1965.5	4.20667	3.87333	4.07667
1965.75	4.24667	3.86667	4.07333
1966	4.47333	4.16667	4.16667
1966.25	4.77	4.61	4.55667
1966.5	4.78	4.58667	4.91333
1966.75	5.14	5.04333	5.41
1967	5.00333	5.21	5.56333
1967.25	4.58333	4.51333	4.82333
1967.5	4.82	3.66	3.99
1967.75	5.24667	4.3	3.89333
1968	5.64333	4.75333	4.17333
1968.25	5.61	5.05	4.78667
1968.5	5.74333	5.52	5.98
1968.75	5.46	5.19667	5.94333
1969	5.77	5.58667	5.91667
1969.25	6.17667	6.09333	6.56667
1969.5	6.35333	6.19667	8.32667
1969.75	6.85667	7.02333	8.98333
1970	7.29667	7.35333	8.94
1970.25	7.36667	7.21	8.57333
1970.5	7.71333	6.67667	7.88
1970.75	7.46	6.32667	6.70333
1971	6.85333	5.35333	5.56667
1971.25	6.01667	3.84	3.85667
1971.5	6.24667	4.25	4.56333
1971.75	6.48333	5.01	5.47333
1972	5.89	4.23	4.75
1972.25	6.03333	3.43667	3.54
1972.5	6.14333	3.77	4.3
1972.75	6.29	4.22	4.74
1973	6.37333	4.86333	5.14333
1973.25	6.60333	5.7	6.53667
1973.5	6.80667	6.60333	7.81667
1973.75	7.20667	8.32333	10.56
1974	6.75333	7.5	9.99667
1974.25	7.05333	7.61667	9.32333
1974.5	7.54333	8.15333	11.25
1974.75	7.96333	8.19	12.09
1975	7.67	7.36	9.34667
1975.25	7.54	5.75	6.30333
1975.5	8.05	5.39333	5.42
1975.75	8.29667	6.33	6.16
1976	8.06333	5.62667	5.41333
1976.25	7.75333	4.91667	4.82667
1976.5	7.77333	5.15667	5.19667
1976.75	7.73	5.15	5.28333
1977	7.19	4.67333	4.87333
1977.25	7.35333	4.63	4.66
1977.5	7.37	4.84	5.15667
1977.75	7.35667	5.49667	5.82
1978	7.59667	6.11	6.51333
1978.25	8.01	6.39333	6.75667
1978.5	8.32	6.47667	7.28333
1978.75	8.49	7.31333	8.1
1979	8.82	8.57	9.58333
1979.25	9.10667	9.38333	10.0733
1979.5	9.11333	9.37667	10.18
1979.75	9.10333	9.67333	10.9467
1980	10.4467	11.8433	13.5767
1980.25	11.9867	13.3533	15.0467
1980.5	10.4767	9.61667	12.6867
1980.75	10.9533	9.15333	9.83667
1981	12.4233	13.6133	15.8533
1981.25	12.96	14.39	16.57
1981.5	13.75	14.9067	17.78
1981.75	14.8467	15.0533	17.5767
1982	14.0867	11.75	13.5867
1982.25	14.2933	12.8133	14.2267
1982.5	13.93	12.42	14.5133
1982.75	13.1167	9.31667	11.0067
1983	10.6667	7.90667	9.28667
1983.25	10.5633	8.10667	8.65333
1983.5	10.5433	8.39667	8.80333
1983.75	11.6267	9.14	9.46
1984	11.6867	8.8	9.43
1984.25	11.9433	9.17	9.68667
1984.5	13.2	9.79667	10.5567
1984.75	12.8667	10.32	11.39
1985	11.7433	8.80333	9.26667
1985.25	11.5833	8.18333	8.47667
1985.5	10.8133	7.46	7.92333
1985.75	10.3367	7.10667	7.9
1986	9.76	7.16667	8.10333
1986.25	8.55667	6.89667	7.82667
1986.5	7.60333	6.14	6.92
1986.75	7.30667	5.52333	6.20667
1987	7.26333	5.35333	6.26667
1987.25	7.19333	5.53667	6.22
1987.5	8.34333	5.65667	6.65
1987.75	8.87667	6.04333	6.84333
1988	9.12333	5.86333	6.91667
1988.25	8.41667	5.72333	6.66333
1988.5	8.91	6.21	7.15667
1988.75	9.1	7.01	7.98333
1989	8.95667	7.72667	8.47
1989.25	9.20667	8.54	9.44333
1989.5	8.77333	8.41	9.72667
1989.75	8.10667	7.84333	9.08333
1990	7.90667	7.65333	8.61333
1990.25	8.42333	7.76	8.25
1990.5	8.67667	7.74667	8.24333
1990.75	8.70333	7.47667	8.16
1991	8.39667	6.99	7.74333
1991.25	8.01667	6.02333	6.42667
1991.5	8.13	5.56	5.86333
1991.75	7.94	5.37667	5.64333
1992	7.34667	4.54	4.81667
1992.25	7.30333	3.89333	4.02333
1992.5	7.37667	3.68	3.77
1992.75	6.61667	3.08333	3.25667
1993	6.74333	3.07	3.03667
1993.25	6.28	2.96	3.04
1993.5	5.99	2.96667	3
1993.75	5.61667	3.00333	3.06
1994	5.60667	3.06	2.99
1994.25	6.06667	3.24333	3.21333
1994.5	7.08333	3.98667	3.94
1994.75	7.33333	4.47667	4.48667
1995	7.83667	5.28	5.16667
1995.25	7.48333	5.73667	5.81
1995.5	6.62	5.59667	6.02
1995.75	6.32333	5.36667	5.79667
1996	5.89333	5.26	5.72
1996.25	5.91	4.93	5.36333
1996.5	6.72	5.02	5.24333
1996.75	6.78	5.09667	5.30667
1997	6.34333	4.97667	5.28
1997.25	6.56333	5.06	5.27667
1997.5	6.69667	5.04667	5.52333
1997.75	6.24333	5.04667	5.53333
1998	5.90667	5.09	5.50667
1998.25	5.58667	5.05333	5.52
1998.5	5.59667	4.97667	5.5
1998.75	5.20333	4.82333	5.53333
1999	4.67	4.25333	4.86
1999.25	4.98333	4.40667	4.73333
1999.5	5.54	4.45333	4.74667
1999.75	5.88333	4.65	5.09333
2000	6.14	5.04333	5.30667
2000.25	6.48	5.52	5.67667
2000.5	6.17667	5.71333	6.27333
2000.75	5.89333	6.01667	6.52
2001	5.56667	6.01667	6.47333
2001.25	5.05	4.81667	5.59333
2001.5	5.27	3.66	4.32667
2001.75	4.98	3.17	3.49667
2002	4.77	1.90667	2.13333
2002.25	5.07667	1.72	1.73333
2002.5	5.1	1.71333	1.75
2002.75	4.26	1.64333	1.74
2003	4.00667	1.33333	1.44333
2003.25	3.92	1.15667	1.25
2003.5	3.62	1.04	1.24667
2003.75	4.23333	0.93	1.01667
2004	4.28667	0.916667	0.996667
2004.25	4.02	0.916667	1.00333
2004.5	4.6	1.07667	1.01
2004.75	4.30333	1.48667	1.43333
2005	4.17333	2.00667	1.95
2005.25	4.29667	2.53667	2.47
2005.5	4.16	2.86333	2.94333
2005.75	4.21333	3.36	3.46
2006	4.49	3.82667	3.98
2006.25	4.57	4.39333	4.45667
2006.5	5.07	4.70333	4.90667
2006.75	4.89667	4.90667	5.24667
2007	4.63	4.90333	5.24667
2007.25	4.68	4.98333	5.25667
2007.5	4.84667	4.73667	5.25
2007.75	4.73	4.30333	5.07333
2008	4.26	3.39	4.49667
2008.25	3.66333	2.04333	3.17667
2008.5	3.88667	1.62667	2.08667
2008.75	3.86333	1.49333	1.94
2009	3.25333	0.296667	0.506667
2009.25	2.73667	0.213333	0.183333
2009.5	3.31333	0.173333	0.18
2009.75	3.51667	0.156667	0.156667
2010	3.46	0.0566667	0.12
2010.25	3.71667	0.106667	0.133333
2010.5	3.49	0.146667	0.193333
2010.75	2.78667	0.156667	0.186667
2011	2.86333	0.136667	0.186667
2011.25	3.46	0.126667	0.156667
2011.5	3.21	0.0466667	0.0933333
2011.75	2.42667	0.0233333	0.0833333
2012	2.04667	0.0133333	0.0733333
2012.25	2.03667	0.0666667	0.103333
2012.5	1.82333	0.0866667	0.153333
2012.75	1.64333	0.103333	0.143333
2013	1.70667	0.0866667	0.16
2013.25	1.95	0.0866667	0.143333
2013.5	1.99667	0.05	0.116667
2013.75	2.71	0.0333333	0.0833333
2014	2.74667	0.0633333	0.0866667
2014.25	2.76333	0.0466667	0.0733333
2014.5	2.62333	0.0333333	0.0933333
2014.75	2.49667	0.0266667	0.09
2015	2.28	0.0233333	0.1
2015.25	1.96667	0.0266667	0.11
2015.5	2.16667	0.02	0.123333
2015.75	2.22	0.04	0.136667
2016	2.19	0.123333	0.16
2016.25	1.92	0.286667	0.36
2016.5	1.75333	0.256667	0.373333
2016.75	1.56333	0.296667	0.396667
2017	2.13	0.43	0.45
2017.25	2.44333	0.59	0.7
2017.5	2.26333	0.89	0.95
2017.75	2.24333	1.03667	1.15333
2018	2.37	1.20667	1.20333
2018.25	2.76	1.56	1.44667
2018.5	2.92	1.84	1.73667
2018.75	2.92667	2.04	1.92333
2019	3.03333	2.31667	2.22
2019.25	2.65333	2.38667	2.40333
2019.5	2.33333	2.3	2.39667
2019.75	1.8	1.98	2.19
2020	1.79	1.58	1.64
2020.25	1.38	1.11	1.26
2020.5	0.69	0.14	0.06
2020.75	0.65	0.11	0.09
2021	0.863333	0.0933333	0.09

## Sheet: AllData
sasdate	BAA10YM	EBP	GFDEGDQ188S	GPDIC1	HOABS	JLNUNC	LIQA	NETFI_GDP	PAYEMS	PCECC96	S&P 500	TFP	TWEXMMTH	UNRATE
1959.25	0.88	N/A	N/A	340.604	55.91	N/A	107834	-0.276292	52726.7	10927	55.5167	103.07	N/A	5.8333
1959.5	0.6967	N/A	N/A	367.099	57.231	N/A	110871	-0.552565	53517.3	11053	57.5067	107.382	N/A	5.1
1959.75	0.6133	N/A	N/A	343.391	56.699	N/A	114355	0.00628531	53522.7	11121	58.73	105.785	N/A	5.2667
1960	0.69	N/A	N/A	354.567	56.649	N/A	117359	-0.155694	53722	11085	57.7633	105.894	N/A	5.6
1960.25	0.8233	N/A	N/A	390.21	56.5	N/A	115196	0.343685	54413.7	11125	56.2767	115.029	N/A	5.1333
1960.5	0.9867	N/A	N/A	353.841	57.057	N/A	115451	0.318437	54545.3	11198	56.07	107.624	N/A	5.2333
1960.75	1.27	N/A	N/A	352.942	56.973	1.83696	115282	0.772355	54268.3	11098	55.72	107.188	N/A	5.5333
1961	1.21	N/A	N/A	313.843	56.326	1.94755	117228	0.904115	53948.3	11068	55.3333	103.324	N/A	6.2667
1961.25	1.2767	N/A	N/A	321.988	56.019	1.94977	116316	0.997765	53633	11027	62.0033	105.046	N/A	6.8
1961.5	1.2267	N/A	N/A	344.549	55.376	1.91588	118870	0.577991	53796.7	11148	65.9833	115.217	N/A	7
1961.75	1.1267	N/A	N/A	371.335	55.771	1.82631	119428	0.758019	54269.7	11156	66.83	119.546	N/A	6.7667
1962	1.14	N/A	N/A	377.479	56.316	1.80255	123131	0.671877	54712	11331	70.2733	124.043	N/A	6.2
1962.25	1.0467	N/A	N/A	397.831	56.896	1.76948	124482	0.523726	55118	11411	69.86	125.861	N/A	5.6333
1962.5	1.14	N/A	N/A	394.694	57.197	1.72969	125576	0.623786	55624.7	11511	62.2233	126.68	N/A	5.5333
1962.75	1.0567	N/A	N/A	401.401	56.896	1.66761	126469	0.783709	55854	11558	57.83	131.208	N/A	5.5667
1963	1.0533	N/A	N/A	389.657	56.498	1.64398	132297	0.582577	56041.7	11675	59.6167	134.699	N/A	5.5333
1963.25	1	N/A	N/A	410.158	56.924	1.61334	142449	0.638761	56221.7	11718	65.55	135.837	N/A	5.7667
1963.5	0.89	N/A	N/A	416.683	57.283	1.59302	145235	0.689637	56618.3	11791	69.67	138.447	N/A	5.7333
1963.75	0.8033	N/A	N/A	429.512	57.262	1.57452	146520	0.810156	56927.3	11905	70.9667	145.158	N/A	5.5
1964	0.72	N/A	N/A	434.727	57.569	1.59041	150596	0.956054	57299.7	11958	73.2733	145.675	N/A	5.5667
1964.25	0.65	N/A	N/A	450.997	58.305	1.61487	149729	1.22286	57712.3	12155	77.5467	149.628	N/A	5.4667
1964.5	0.65	N/A	N/A	449.373	58.824	1.60028	153765	0.880541	58076.7	12331	80.3	151.27	N/A	5.2
1964.75	0.63	N/A	N/A	459.861	59.148	1.67212	153974	1.1748	58644.7	12513	82.8767	155.128	N/A	5
1965	0.6367	N/A	N/A	464.229	59.525	1.88612	155881	1.08602	59144	12504	84.75	154.395	N/A	4.9667
1965.25	0.5833	N/A	N/A	508.491	60.257	1.70881	155858	0.788392	59795	12748	86.5667	161.084	N/A	4.9
1965.5	0.6133	N/A	N/A	509.827	61.042	1.64562	157261	0.858542	60480	12854	87.43	161.19	N/A	4.6667
1965.75	0.6433	N/A	N/A	527.578	60.939	1.66753	156830	0.876791	61227.7	13031	86.9267	167.623	N/A	4.3667
1966	0.4933	N/A	N/A	531.072	61.575	1.66388	161440	0.794577	62012.3	13354	91.7567	172.898	N/A	4.1
1966.25	0.3967	N/A	40.34	573.502	62.185	1.70339	159351	0.58223	62839	13518	91.63	179.029	N/A	3.8667
1966.5	0.71	N/A	39.2676	565.012	62.631	1.75892	160416	0.411935	63753.3	13517	88.1467	176.35	N/A	3.8333
1966.75	0.7267	N/A	39.6209	560.844	62.752	1.76629	159798	0.39066	64483.7	13629	81.4333	175.62	N/A	3.7667
1967	1.1333	N/A	39.5198	564.131	62.614	1.77871	169111	0.490098	65024	13644	79.8167	176.567	N/A	3.7
1967.25	1.2967	N/A	39.2038	550.286	62.574	1.80157	170744	0.504875	65455.3	13689	87.0767	177.016	N/A	3.8333
1967.5	1.16	N/A	38.0329	530.378	61.954	1.78814	168848	0.3834	65612	13842	91.66	178.517	N/A	3.8333
1967.75	1.0833	N/A	38.8214	545.93	62.338	1.8229	169495	0.414108	66065	13874	94.4367	178.958	N/A	3.8
1968	1.08	N/A	39.1023	557.706	62.621	1.87678	175759	0.321293	66609.3	13920	94.54	179.815	N/A	3.9
1968.25	1.22	N/A	38.4295	568.887	62.676	1.89174	179719	0.177152	67104.7	14223	91.6267	186.014	N/A	3.7333
1968.5	1.28	N/A	36.9638	590.647	63.159	1.80883	184136	0.21673	67704.3	14407	98.0133	189.369	N/A	3.5667
1968.75	1.4033	N/A	37.309	574.539	63.51	1.74804	188598	0.192885	68313.3	14637	99.9033	190.666	N/A	3.5333
1969	1.2567	N/A	36.9853	580.789	63.884	1.76123	195052	0.0681797	68984.3	14664	105.233	189.711	N/A	3.4
1969.25	1.2	N/A	36.1958	614.989	64.798	1.77828	198718	0.168422	69681	14796	100.933	189.414	N/A	3.4
1969.5	1.2333	N/A	34.974	611.366	64.934	1.8543	201202	0.0500486	70345.3	14857	101.68	188.091	N/A	3.4333
1969.75	1.06	N/A	35.0195	623.778	65.126	1.86605	203477	0.165735	70883.7	14888	94.4667	187.795	N/A	3.5667
1970	1.0767	N/A	35.4695	593.659	64.809	1.89616	210525	0.243703	71149.3	14963	94.28	184.674	N/A	3.5667
1970.25	1.39	N/A	35.3888	575.953	64.465	1.98998	216242	0.371861	71310.7	15019	88.7067	182.528	N/A	4.1667
1970.5	1.2633	N/A	34.6733	577.205	63.834	1.9833	211736	0.472936	71167	15040	79.2	183.962	N/A	4.7667
1970.75	1.95	N/A	34.8672	586.598	63.411	1.9836	213670	0.343996	70978	15120	78.74	188.49	N/A	5.1667
1971	2.4233	N/A	35.7482	555.454	62.801	2.13148	222681	0.202185	70574	15027	86.2333	183.994	N/A	5.8333
1971.25	2.5133	N/A	34.5035	620.212	63.104	1.96712	223674	0.395364	70844	15269	96.7333	193.401	N/A	5.9333
1971.5	2.36	N/A	34.3609	637.811	63.477	1.85643	224879	-0.0119349	71179	15364	101.44	193.669	N/A	5.9
1971.75	2.22	N/A	35.0069	645.549	63.305	1.89912	228169	-0.00169826	71434	15439	98.5467	197.121	N/A	6.0333
1972	2.5233	N/A	35.6324	628.165	63.95	1.90408	237414	-0.259095	71866	15647	96.4133	196.526	N/A	5.9333
1972.25	2.2	N/A	34.7262	669.558	64.749	1.85379	243559	-0.408822	72677.7	15816	105.4	200.308	N/A	5.7667
1972.5	2.08	N/A	33.6738	707.589	65.075	1.75517	246718	-0.375404	73463	16079	108.167	206.466	N/A	5.7
1972.75	1.88	N/A	33.6245	717.638	65.578	1.84483	250818	-0.27887	74038	16284	109.2	209.041	N/A	5.5667
1973	1.62	N/A	33.7476	722.138	66.173	1.90386	261694	-0.209345	74971.7	16623	114.067	215.514	N/A	5.3667
1973.25	1.3633	-0.114391	33.2929	764.458	67.058	1.97487	268622	0.160146	75971.7	16890	115	221.53	103.978	4.9333
1973.5	1.2867	-0.193576	32.3447	797.044	67.784	2.03729	278677	0.382492	76663.3	16844	107.433	220.858	99.6997	4.9333
1973.75	1.26	-0.858682	32.1245	768.143	68.171	2.29575	290701	0.869973	77119	16862	105.067	216.228	97.2913	4.8
1974	1.6833	0.220205	31.7738	795.504	68.575	2.35709	304782	1.04031	77852.7	16771	102.193	216.725	99.9419	4.7667
1974.25	1.49	0.0399141	31.7645	750.076	68.566	2.3811	312449	1.10762	78216.7	16586	95.6667	208.792	103.599	5.1333
1974.5	1.52	0.78781	30.9946	747.082	68.433	2.3424	321644	0.174046	78511.7	16611	90.64	206.277	99.7554	5.2
1974.75	1.8467	2.83671	30.8627	708.362	68.05	2.40062	325352	0.0198074	78621.7	16639	74.4867	201.596	102.522	5.6333
1975	2.9	3.10594	30.7977	712.661	67.038	2.51503	344643	0.274555	78182.3	16354	69.4167	199.359	102.316	6.6
1975.25	3.1067	1.3506	31.536	597.866	64.905	2.39917	365212	1.10691	76953	16458	78.8133	199.849	99.3828	8.2667
1975.5	2.58	0.767233	32.2782	580.067	64.377	2.27804	383754	1.29878	76535	16688	89.0733	204.713	100.127	8.8667
1975.75	2.2867	0.730445	32.3804	625.037	65.035	2.13063	374300	1.07549	77050.3	16876	87.6233	210.529	104.445	8.4667
1976	2.5167	0.201339	32.7301	642.484	65.974	1.95219	395967	1.2273	77747.3	17013	89.1133	211.923	105.598	8.3
1976.25	2.5033	-0.328124	32.9851	704.475	66.924	1.92725	422920	0.722444	78789	17316	99.52	218.447	105.647	7.7333
1976.5	2.1233	-0.211906	33.4946	732.358	67.077	1.84089	437329	0.485496	79326.7	17438	101.633	220.291	106.839	7.5667
1976.75	1.89	-0.407874	33.6433	734.91	67.39	1.78723	440403	0.127534	79714.3	17577	104.333	221.072	106.226	7.7333
1977	2.0233	-0.477855	33.7875	740.408	67.539	1.88571	465556	0.1978	80199.7	17758	102.6	221.755	106.962	7.7667
1977.25	1.7533	-0.668865	33.6514	774.711	68.212	1.9216	469575	-0.40339	81023	17925	101.8	224.202	107.306	7.5
1977.5	1.6267	-0.753278	32.8042	830.251	69.744	1.74545	490664	-0.430126	82101.3	17979	99.0333	227.607	106.881	7.1333
1977.75	1.4733	-0.487065	32.9879	872.264	70.291	1.70758	506986	-0.370928	83147	18098	98.06	232.766	106.234	6.9
1978	1.3467	-0.584871	33.2187	850.383	71.008	1.84494	533422	-0.874798	84127.7	18318	93.9467	229.865	103.9	6.6667
1978.25	1.1867	-0.995465	33.5012	866.957	71.372	1.97591	534677	-1.1353	85000.7	18378	89.35	228.471	100.721	6.3333
1978.5	1.15	-0.974795	32.1244	923.266	73.398	1.89723	560245	-0.55133	86540.3	18724	95.9267	236.497	99.656	6
1978.75	1.01	-1.04443	32.2141	950.166	73.996	1.82707	579033	-0.475397	87436	18747	101.663	236.402	94.8214	6.0333
1979	0.9667	-1.10966	31.8621	972.139	74.8	1.85905	617183	-0.0509094	88339.3	18844	97.14	236.659	93.6321	5.9
1979.25	1.05	-0.736249	31.536	973.754	75.323	1.98748	646596	-0.0716771	89114	18893	99.3467	234.953	94.874	5.8667
1979.5	1.28	-0.651138	31.0628	972.877	75.483	2.16911	680517	-0.10412	89771.3	18832	101.177	230.798	96.3228	5.7
1979.75	1.29	-0.702078	30.984	956.493	76.169	2.21637	709840	0.0912068	90281.3	18957	106.233	229.2	94.6398	5.8667
1980	1.37	-0.652824	31.0262	939.526	76.439	2.35413	752525	-0.0950114	90575.3	18946	105.333	227.635	96.5819	5.9667
1980.25	1.4933	-0.105877	30.9498	933.101	76.067	2.72432	776348	-0.382316	90892.3	18866	110.3	227.02	96.6136	6.3
1980.5	2.88	-0.592691	31.373	853.76	74.72	3.04557	818613	0.351904	90456.7	18389	108.433	219.455	96.128	7.3333
1980.75	2.2133	0.0370336	31.7769	797.411	74.436	2.79553	855728	0.985723	90050.7	18535	123.267	219.796	93.4363	7.6667
1981	2.2467	0.335196	31.157	871.733	75.464	2.65629	901597	0.224682	90726.7	18735	133.133	224.947	95.2374	7.4
1981.25	2.2867	0.533516	30.8728	952.418	75.883	2.6088	949839	0.0533576	91116	18760	131.533	228.819	98.2034	7.4333
1981.5	2.02	1.36277	30.7087	912.945	75.789	2.62132	985883	0.00543868	91356.3	18719	132.8	225.52	104.454	7.4
1981.75	1.63	1.18708	30.6033	964.401	75.785	2.55121	1045725	0.216892	91547.7	18754	125.667	230.091	109.792	7.4
1982	2.5967	1.54724	31.3559	930.44	75.488	2.54352	1120411	0.140026	91148.7	18577	122.167	222.745	106.232	8.2333
1982.25	2.74	2.296	32.413	842.429	74.182	2.57916	1127986	0.0198821	90520.7	18674	114.2	218.045	109.964	8.8333
1982.5	2.85	2.39998	32.4021	841.789	74.425	2.44657	1174105	0.523384	90040.7	18690	114.133	216.652	114.054	9.4333
1982.75	3.1333	1.28484	33.9253	834.075	73.94	2.38445	1261680	-0.416954	89355.7	18767	113.833	214.041	118.835	9.9
1983	3.7233	1.50859	35.1816	769.602	73.241	2.31633	1339641	-0.507059	88821.3	19049	136.733	214.171	120.182	10.6667
1983.25	3.27	0.779616	35.8291	796.266	73.655	2.27836	1361210	-0.227298	88999	19198	147.667	216.335	117.05	10.3667
1983.5	2.7067	0.0197546	36.8717	866.784	74.438	2.07231	1407625	-0.772204	89676.3	19549	162.733	222.056	119.275	10.1333
1983.75	1.9	-0.382106	37.3311	921.051	75.962	1.98005	1460299	-1.29864	90604.3	19850	165.533	223.539	122.728	9.3667
1984	1.92	0.0331176	37.1755	1010.65	77.183	1.87944	1552241	-1.49603	91875	20120	165.767	228.358	122.733	8.5333
1984.25	1.8	-0.0646881	37.4545	1108.33	78.69	1.88791	1614307	-2.00959	93086.3	20248	160.367	233.665	123.457	7.8667
1984.5	1.5	-0.304013	37.7269	1144.37	79.675	1.81979	1660870	-2.19289	94123	20490	155.767	237.149	124.927	7.4333
1984.75	1.8433	0.0142575	38.4959	1169.14	80.032	1.84157	1732257	-2.21431	95055	20592	160.533	237.592	131.743	7.4333
1985	1.8633	-0.280833	40.0855	1153.97	80.473	1.87534	1867101	-2.49292	95906	20808	165.2	237.339	134.888	7.3
1985.25	1.81	-0.143067	40.4412	1122.33	81.075	1.89343	1909182	-2.11365	96572.3	21122	177.3	239.238	142.134	7.2333
1985.5	2.2067	-0.210852	41.3198	1141.45	81.517	1.87351	2001684	-2.59287	97269.7	21271	184.8	238.183	138.135	7.3
1985.75	2.1333	0.313546	41.5591	1133.66	81.63	1.84152	2082149	-2.76458	97844.3	21619	188.3	242.321	131.368	7.2
1986	2.2167	0.50325	43.7871	1175.45	81.963	1.90982	2307869	-3.0415	98428.3	21612	197	242.193	122.753	7.0333
1986.25	2.46	0.657095	44.0742	1175.11	81.978	2.04038	2423252	-2.84667	98837.7	21758	219.967	244.898	116.396	7.0333
1986.5	2.67	0.613298	45.3068	1154.59	81.765	2.00946	2545230	-3.12102	99174.7	21949	240.6	245.044	110.701	7.1667
1986.75	2.8733	1.7669	46.1254	1123.53	82.205	1.96235	2657739	-3.26022	99665	22282	241.167	245.581	106.109	6.9667
1987	2.83	1.84718	47.5529	1126.89	82.807	1.9733	2789626	-3.2269	100313	22365	243.7	244.505	106.235	6.8333
1987.25	2.4667	1.59886	47.5784	1157.31	83.799	1.99096	2935515	-3.19642	100920	22344	279.3	243.388	100.484	6.6
1987.5	2.0133	0.104221	48.0487	1157.91	84.303	1.84026	2995339	-3.21219	101709	22601	293.267	247.968	96.9444	6.2667
1987.75	2.03	0.860456	48.1165	1158.08	84.827	1.83575	3082346	-3.15384	102438	22802	319.4	249.357	98.3411	6
1988	2.2567	-0.454749	48.5567	1236.99	85.704	1.90287	3060463	-3.13515	103390	22794	255.4	251.161	92.8776	5.8333
1988.25	2.3367	-0.0822866	49.0315	1177.6	85.767	1.82985	3139786	-2.50064	104152	23151	258.1	252.877	89.7548	5.7
1988.5	2.07	0.230086	49.0874	1205.66	86.944	1.74425	3176358	-2.1186	105007	23273	263.133	253.018	88.7696	5.4667
1988.75	1.9733	0.260762	49.2573	1212.36	87.097	1.73293	3249777	-2.01513	105746	23419	266.933	254.192	93.611	5.4667
1989	1.5567	1.16569	49.7155	1230.86	88.119	1.76498	3283524	-2.21529	106597	23626	274.967	254.841	89.5112	5.3333
1989.25	1.4367	1.3009	49.7328	1272.64	88.959	1.87609	3416921	-1.93588	107403	23688	290.7	253.871	91.2728	5.2
1989.5	1.5933	1.81343	49.8876	1260.33	89.176	1.88771	3592520	-1.66725	107910	23745	313.3	250.784	95.3642	5.2333
1989.75	1.78	2.36849	50.1712	1249.01	89.489	1.87926	3669573	-1.43369	108186	23909	341.933	250.782	95.9911	5.2333
1990	1.9067	1.87575	51.3811	1239.75	89.462	1.87956	3787431	-1.52214	108688	23948	345.4	249.573	94.3329	5.3667
1990.25	1.6733	1.22168	51.9686	1252.06	89.6	2.0062	3818147	-1.53323	109426	24095	336.293	252.3	93.0562	5.3
1990.5	1.6333	0.460767	52.7473	1252.45	89.138	1.935	3875618	-1.22253	109794	24093	349.607	254.153	93.4437	5.3333
1990.75	1.7133	-0.126092	53.7531	1228.17	88.576	1.96959	3884334	-1.3695	109653	24103	335.397	252.773	88.5555	5.7
1991	2.2	0.922157	56.0361	1159.46	88.346	2.02497	4021879	-0.904487	109249	23836	317.053	248.235	84.4299	6.1333
1991.25	2.1867	1.03896	57.4165	1120.88	87.467	1.98599	4188392	0.771808	108788	23673	353.343	246.164	85.654	6.6
1991.5	1.79	0.54357	57.7455	1120.88	86.937	1.87262	4246222	0.241119	108316	23793	378.653	249.589	90.8795	6.8333
1991.75	1.7433	0.566499	59.0612	1143.07	86.859	1.76549	4422197	-0.209928	108313	23827	385.61	250.989	90.7133	6.8667
1992	2.0533	0.592763	60.686	1183.61	86.673	1.7436	4522068	-0.268032	108327	23734	387.103	251.061	86.8251	7.1
1992.25	1.9	0.257927	60.9968	1161.74	86.098	1.76756	4532409	-0.342427	108348	24107	412	260.8	87.5295	7.3667
1992.5	1.7533	0.0816417	61.5794	1227.44	86.555	1.71483	4670680	-0.608738	108628	24190	410.163	262.722	87.8747	7.6
1992.75	2.0867	0.232835	61.898	1237.2	86.665	1.71718	4793788	-0.802526	108892	24359	417.153	263.378	83.9069	7.6333
1993	2.1267	0.357845	62.5226	1274.94	87.2	1.75345	4898517	-1.02413	109302	24565	423.66	264.119	88.7795	7.3667
1993.25	2.1233	0.174583	62.8666	1305	87.844	1.73478	5024859	-0.851762	109944	24586	442.363	259.125	91.1419	7.1333
1993.5	2.15	0.0300657	63.9152	1312.51	88.784	1.67404	5158727	-1.09406	110538	24735	445.463	259.278	88.217	7.0667
1993.75	2.0067	-0.0583436	64.1009	1303.6	89.299	1.62501	5365356	-1.12485	111236	24925	453.553	257.113	89.4649	6.8
1994	1.9467	-0.286686	64.6686	1372.1	90.13	1.67995	5516219	-1.5434	112010	25063	464.247	261.862	90.8465	6.6333
1994.25	1.78	-0.978483	64.3071	1424.36	90.971	1.73199	5541844	-1.3065	112873	25282	469.46	259.801	91.2171	6.5667
1994.5	1.5133	-0.864342	64.1072	1494.41	92.542	1.65535	5567952	-1.50686	113915	25404	450.987	260.951	89.7368	6.2
1994.75	1.5067	-0.942449	64.0118	1470	93.571	1.63212	5714865	-1.66004	114918	25516	460.867	259.227	86.6681	6
1995	1.37	-0.722151	64.3858	1530.48	93.989	1.64955	5768275	-1.85813	115831	25713	460.003	263.646	86.0658	5.6333
1995.25	1.3933	-0.796763	64.6627	1546.55	94.461	1.69516	5984294	-1.58492	116702	25708	480.107	261.906	85.4335	5.4667
1995.5	1.6133	-0.70801	65.3129	1514.43	94.417	1.70973	6282990	-1.57475	117135	25860	523.69	261.61	80.6616	5.6667
1995.75	1.73	-0.670365	64.7391	1505.4	95.352	1.67216	6479902	-1.29879	117630	26010	565.083	263.01	83.1299	5.6667
1996	1.7467	-0.208447	64.1828	1542.79	95.53	1.69276	6760031	-1.09426	118175	26111	597.673	263.515	84.6337	5.5667
1996.25	1.8	-0.751252	65.0417	1567.56	95.727	1.8029	6970911	-1.30809	118683	26287	637.01	265.918	86.5552	5.5333
1996.5	1.5767	-0.882283	64.2497	1642.88	96.544	1.70238	7092798	-1.36117	119471	26494	658.967	269.263	87.4522	5.5
1996.75	1.5133	-1.06702	64.2547	1717.51	97.258	1.64938	7276256	-1.64209	120208	26568	660.543	270.701	87.237	5.2667
1997	1.5733	-0.98901	64.447	1715.24	98.335	1.65071	7577076	-1.38374	120923	26694	726.793	271.8	87.7277	5.3333
1997.25	1.5067	-1.2744	64.3443	1749.88	99.207	1.66152	7804474	-1.57794	121676	26904	785.59	270.857	92.078	5.2333
1997.5	1.49	-1.44613	63.1091	1856.96	99.648	1.65619	8196716	-1.19605	122549	26948	824.437	274.948	93.3597	5
1997.75	1.5133	-1.57883	62.4871	1882.95	100.16	1.68463	8623867	-1.41727	123263	27317	929.85	278.488	94.6787	4.8667
1998	1.53	-1.16696	62.7703	1911.05	100.518	1.69282	8803471	-1.86814	124238	27557	950.817	279.924	95.5675	4.6667
1998.25	1.6667	-1.0925	62.5099	1994.38	101.086	1.71517	9464906	-1.85935	124997	27765	1021.31	281.71	97.9916	4.6333
1998.5	1.6567	-1.16751	61.852	1982.06	101.696	1.77286	9594326	-2.18599	125787	28176	1109.67	283.018	99.2127	4.4
1998.75	1.9233	-0.18339	60.5869	2033.02	101.765	1.8827	9542982	-2.46269	126500	28455	1083.95	286.617	100.796	4.5333
1999	2.58	0.391162	60.407	2095.76	102.945	1.83186	10090822	-2.53689	127260	28779	1122.32	287.095	95.6473	4.4333
1999.25	2.42	-0.360704	60.0133	2153.31	102.605	1.81674	10590016	-2.48904	128016	28985	1259	292.144	96.2441	4.3
1999.5	2.2	-0.629781	59.2051	2154.65	103.212	1.79071	11026952	-2.77604	128831	29327	1329.79	290.506	98.4834	4.2667
1999.75	2.2167	-0.102649	58.4213	2213.77	103.84	1.75999	11147892	-3.0795	129585	29564	1342.22	291.871	97.5602	4.2333
2000	2.1	-0.0402222	58.348	2273.09	104.382	1.83668	12194768	-3.19378	130472	29907	1373.23	295.841	95.7675	4.0667
2000.25	1.85	0.425848	57.7174	2257.11	104.972	1.94713	12468737	-3.70066	131242	30290	1418.89	298.312	97.833	4.0333
2000.5	2.4167	1.90004	55.4851	2390.73	105.061	2.0598	12421456	-3.70351	132018	30507	1447.27	302.026	100.727	3.9333
2000.75	2.4267	2.87638	54.9833	2367.27	105.135	2.01986	12630746	-4.01158	132273	30723	1475.5	300.423	102.554	4
2001	2.6467	4.59578	54.2409	2371.81	104.547	2.02202	12624276	-3.96126	132539	30905	1366.37	301.861	105.81	3.9
2001.25	2.83	3.31545	55.1304	2264.2	104.514	2.06105	12433545	-3.95415	132745	30958	1275.74	299.926	105.389	4.2333
2001.5	2.7667	2.5612	54.0377	2267.43	103.347	2.04767	12631393	-3.54231	132391	30958	1232.97	302.009	109.052	4.4
2001.75	2.97	2.62934	54.8066	2218.37	102.201	2.16273	12301291	-3.8588	131992	30983	1142.53	299.655	108.042	4.8333
2002	3.1533	1.14282	55.7531	2108.5	101.119	2.19711	12920860	-3.17469	131193	31367	1117.07	300.546	108.933	5.5
2002.25	2.88	1.48282	55.6683	2170.71	100.306	1.99321	13089502	-3.62424	130768	31394	1131.56	306.607	111.571	5.7
2002.5	2.9233	1.69722	56.2412	2206.38	100.52	1.86194	12732529	-4.08347	130647	31485	1068.4	307.313	107.396	5.8333
2002.75	3.3667	4.44613	56.6613	2203.11	100.141	1.82628	12581475	-4.06388	130559	31633	894.65	308.217	102.987	5.7333
2003	3.5933	3.17598	57.8578	2201.75	100.301	1.85374	13009595	-4.37208	130572	31738	887.913	308.833	102.769	5.8667
2003.25	3.2	1.46523	57.7706	2218.68	99.737	1.94636	13006524	-4.70683	130419	31821	859.833	310.842	97.9895	5.8667
2003.5	2.8533	-1.03287	58.9604	2234	99.258	1.95054	13579711	-4.49638	130189	32106	937.997	314.83	93.431	6.1333
2003.75	2.5733	-1.9878	58.6421	2315.4	99.584	1.91092	13700913	-4.39594	130198	32497	1000.5	319.79	93.2642	6.1333
2004	2.3767	-1.6859	59.4596	2393.4	100.094	1.85568	13944599	-4.18231	130505	32639	1056.42	321.505	87.963	5.8333
2004.25	2.2533	-1.62825	59.8235	2398.15	100.41	1.81635	14130108	-4.45581	130912	32866	1133.29	322.522	85.4146	5.7
2004.5	2.0633	-1.56488	60.0739	2493.95	100.562	1.85516	14306375	-5.07336	131633	32998	1122.97	325.594	88.1153	5.6
2004.75	2.1467	-1.32686	59.976	2532.64	101.16	1.83836	14490610	-5.12994	131959	33280	1104.15	328.756	86.5803	5.4333
2005	2.0133	-1.96766	60.6603	2585.48	101.426	1.91445	14770949	-5.65621	132525	33559	1161.79	328.941	81.9125	5.4333
2005.25	1.67	-2.39421	60.9414	2658.16	101.742	1.94465	14839826	-5.20323	132987	33683	1191.98	330.764	81.3714	5.3
2005.5	1.8133	-1.319	60.7009	2622.79	102.567	1.91892	14976451	-5.44163	133717	33992	1181.65	330.694	83.6281	5.1
2005.75	1.7667	-1.70814	60.3575	2657.46	102.701	2.09094	15333939	-5.56991	134453	34235	1224.14	333.045	84.635	4.9667
2006	1.8467	-1.06164	61.2828	2743.85	103.251	2.14001	15695730	-6.14058	134932	34251	1230.47	334.975	85.8336	4.9667
2006.25	1.7367	-1.19875	61.5348	2784.58	104.175	2.02833	15852672	-5.77114	135738	34557	1283.04	338.486	84.9616	4.7333
2006.5	1.6667	-1.2711	61.2375	2766.63	104.525	1.99426	15791824	-5.90275	136258	34654	1281.78	336.876	82.1527	4.6333
2006.75	1.6967	-1.02996	61.3448	2755.95	105.098	2.02232	16194577	-6.16536	136686	34774	1288.38	335.105	81.6838	4.6333
2007	1.65	-1.32911	61.8372	2702.49	105.516	2.01929	16660448	-5.3248	137055	35021	1389.48	336.359	81.7015	4.4333
2007.25	1.6167	-1.53815	62.284	2683.89	105.579	1.98189	16981439	-5.4986	137609	35140	1425.3	335.3	81.9776	4.5
2007.5	1.6467	-1.42594	61.6566	2713.49	105.752	1.90386	17451518	-5.22546	137968	35126	1496.32	334.895	79.4354	4.5
2007.75	1.9	0.150324	61.9721	2686.11	105.321	1.96408	17913755	-4.67719	138049	35233	1490.82	332.581	77.116	4.6667
2008	2.25	0.696846	62.8626	2653.06	105.28	2.05933	18237219	-4.27289	138283	35244	1494.09	332.552	73.3918	4.8
2008.25	3.0867	2.616	64.4159	2583.25	104.974	2.21275	18442424	-4.84338	138334	35073	1350.19	327.678	72.0646	5
2008.5	3.1033	1.93839	64.1109	2536.4	104.337	2.41317	18535862	-4.76457	137860	35053	1371.65	327.822	70.833	5.3333
2008.75	3.3433	3.835	67.574	2485.55	103.127	2.82506	18323021	-4.68547	137152	34706	1251.92	326.424	73.4932	6
2009	5.5867	9.11838	73.49	2246.44	100.761	3.18556	17711803	-4.10795	135552	34302	909.8	319.097	81.4719	6.8667
2009.25	5.4767	8.17838	77.2997	1986.85	98.177	2.96551	17413028	-2.6534	133293	34156	809.313	316.261	82.9126	8.2667
2009.5	4.67	4.13756	80.4389	1872.29	95.99	2.64977	17510675	-2.38298	131433	33948	892.227	321.125	79.571	9.3
2009.75	3.1433	0.119431	82.5906	1868.01	94.89	2.40961	17871481	-2.48983	130466	34103	996.7	325.416	75.328	9.6333
2010	2.8667	-0.886375	84.1628	2040.74	94.823	2.18763	17846504	-2.67863	129963	33974	1088.7	330.97	72.8428	9.9333
2010.25	2.57	-0.488972	86.766	2087.17	94.866	2.17245	17515882	-2.79687	129789	34074	1121.6	331.807	74.8641	9.8333
2010.5	2.6867	-0.544457	88.4477	2196.71	95.743	2.08534	17179923	-2.89659	130424	34283	1135.25	335.23	77.6582	9.6333
2010.75	2.99	-0.319791	89.9317	2294.67	96.219	1.93226	17601819	-3.06906	130402	34455	1096.39	339.338	75.9042	9.4667
2011	3.05	-0.679799	92.0239	2287.36	96.625	1.96346	18064994	-2.74446	130732	34615	1204	339.095	72.9765	9.5
2011.25	2.63	-0.668406	93.3552	2244.24	96.847	1.99863	18207067	-3.11016	131061	34706	1302.74	336.967	71.8962	9.0333
2011.5	2.64	-0.493705	92.5588	2336.06	97.57	1.94772	18157143	-3.10272	131748	34726	1319.04	337.932	69.5532	9.0667
2011.75	3.0367	0.0736721	94.8594	2343.79	97.988	1.94842	17813942	-2.8448	132161	34794	1228.13	335.778	69.7838	9
2012	3.2067	0.38697	96.3693	2524.43	98.761	1.87333	18525962	-2.83077	132717	34792	1225.65	339.148	72.3955	8.6333
2012.25	3.1633	-0.393079	97.4204	2577.16	99.582	1.79137	18876695	-2.98389	133505	35015	1347.44	343.873	72.931	8.2667
2012.5	3.27	-0.429019	98.1599	2636.49	99.712	1.7589	18779732	-2.85398	133925	35011	1350.39	342.912	74.0043	8.2
2012.75	3.23	-0.679037	98.8257	2648.46	100.13	1.80184	19287054	-2.56041	134336	35001	1402.22	340.646	74.1132	8.0333
2013	2.8667	-0.617514	100.452	2624.91	100.573	1.85372	19642120	-2.50714	134861	35092	1418.21	340.781	73.2387	7.8
2013.25	2.86	-0.397388	101.218	2722.78	100.873	1.87056	19821973	-2.40318	135495	35223	1514.51	341.678	74.875	7.7333
2013.5	2.84	-1.18897	100.603	2753.24	101.215	1.7136	19372060	-2.31713	136079	35195	1609.77	341.458	76.4887	7.5333
2013.75	2.6933	-0.379216	99.3438	2859.75	101.847	1.67773	19587448	-2.15229	136610	35270	1675.31	341.639	76.5084	7.2333
2014	2.61	-0.259294	100.427	2870.13	102.224	1.67778	20179888	-1.72946	137239	35505	1770.45	343.372	75.7575	6.9333
2014.25	2.3533	-0.908343	102.904	2838.29	102.668	1.71061	19987507	-2.09905	137743	35587	1834.31	339.889	76.8791	6.6667
2014.5	2.1967	-1.17119	101.146	2958.07	103.414	1.64515	20315908	-1.93738	138547	35917	1900.37	345.688	76.3369	6.2
2014.75	2.2433	-0.984429	100.578	3018.58	104.198	1.7251	20401875	-1.97351	139297	36231	1975.95	348.218	77.8194	6.0667
2015	2.46	-0.260543	101.633	3021.86	105.472	1.86643	20947028	-2.32972	140101	36597	2012.04	347.894	82.542	5.7
2015.25	2.5333	-0.747983	100.826	3127.27	105.775	2.03704	20733601	-2.3333	140772	36863	2063.46	350.233	89.4186	5.5333
2015.5	2.6667	0.0125871	99.6072	3136.69	106.182	1.9712	20467978	-2.21108	141473	37096	2102.03	350.553	89.8656	5.4333
2015.75	3.0233	0.935611	98.9273	3130.35	106.258	1.90161	20147855	-2.49086	142136	37332	2026.47	349.364	91.5973	5.1
2016	3.23	1.40992	102.957	3092.71	106.985	1.94003	20840800	-2.25663	142836	37459	2068.63	346.348	92.9198	5.0333
2016.25	3.3867	2.18032	104.303	3073.86	107.435	1.95552	21054456	-2.3209	143422	37686	1947.86	348.197	93.1126	4.9333
2016.5	2.9133	0.230965	103.888	3047.03	107.844	1.82178	21513928	-2.11723	143966	37866	2074.99	344.269	89.4617	4.9
2016.75	2.6933	-0.396506	103.996	3048.09	108.097	1.73892	22101164	-2.14859	144692	38039	2161.36	345.993	90.2097	4.9
2017	2.51	-1.32575	104.961	3130.11	108.147	1.75027	22027353	-2.1107	145238	38204	2184.88	347.755	93.6069	4.7667
2017.25	2.2167	-0.732654	103.166	3120.37	108.65	1.76349	22246033	-1.9124	145795	38451	2317	348.691	94.3043	4.5667
2017.5	2.2333	-0.61035	102.401	3149.11	109.219	1.74097	22555793	-2.23436	146316	38570	2396.22	349.563	92.9325	4.3667
2017.75	2.09	-0.675097	103.199	3207.49	109.388	1.73864	23461216	-1.88254	146856	38727	2467.72	350.63	88.2502	4.3
2018	1.9	-0.73767	102.783	3256.71	110.476	1.7475	23886436	-1.98557	147389	39065	2604.98	351.368	88.8642	4.1333
2018.25	1.71	-0.963486	104.186	3342.47	110.905	1.74486	23900190	-2.01474	148001	39219	2732.58	352.935	86.0913	4.0667
2018.5	1.8567	-0.706448	103.126	3333.26	111.258	1.72488	24154957	-1.92897	148649	39480	2703.16	353.083	88.2614	3.9333
2018.75	1.8867	-0.622989	103.728	3415.41	111.844	1.66681	24604648	-2.54207	149213	39683	2850.99	354.011	90.1604	3.7667
2019	2.1067	0.257798	105.09	3448.3	112.065	1.75832	24295857	-2.5807	149699	39784	2692	352.68	91.5017	3.8
2019.25	2.3167	-0.133016	104.322	3481.31	112.058	1.81763	24831328	-2.51969	150184	39927	2722.08	355.504	91.4569	3.8667
2019.5	2.2633	-0.279807	103.251	3429.95	111.806	1.80353	25646241	-2.5118	150609	40250	2882.89	356.135	92.1609	3.6333
2019.75	2.2233	-0.78368	105.474	3445.7	112.556	1.81323	26741215	-2.35721	151160	40463	2958.59	354.921	92.2258	3.6333
2020	2.12	-1.0356	106.686	3413.31	112.952	1.98156	27456527	-2.00312	151788	40566	3086.44	355.774	92.2181	3.5333
2020.25	2.5133	0.543191	107.711	3333.96	111.212	2.205	27596213	-1.96376	151922	39810	3055.87	353.395	111.364	3.8333
2020.5	3.22	0.873137	135.641	2849.79	96.912	2.77582	29416091	-2.90046	133713	35951	2931.69	336.138	112.431	13.0333
2020.75	2.66333	-0.662498	127.279	3314.55	104.716	2.7301	29734987	-3.30778	140783	39122	3319.83	349.108	107.263	8.8333
2021	2.43667	-1.3748	129.091	3539.86	107.46	2.64658	30794577	-3.55375	142619	39294	3554.5	348.146	105.21	6.76667

## Sheet: ConsumptionperCapita
sasdate	PCECC96
1959.25	10927
1959.5	11053
1959.75	11121
1960	11085
1960.25	11125
1960.5	11198
1960.75	11098
1961	11068
1961.25	11027
1961.5	11148
1961.75	11156
1962	11331
1962.25	11411
1962.5	11511
1962.75	11558
1963	11675
1963.25	11718
1963.5	11791
1963.75	11905
1964	11958
1964.25	12155
1964.5	12331
1964.75	12513
1965	12504
1965.25	12748
1965.5	12854
1965.75	13031
1966	13354
1966.25	13518
1966.5	13517
1966.75	13629
1967	13644
1967.25	13689
1967.5	13842
1967.75	13874
1968	13920
1968.25	14223
1968.5	14407
1968.75	14637
1969	14664
1969.25	14796
1969.5	14857
1969.75	14888
1970	14963
1970.25	15019
1970.5	15040
1970.75	15120
1971	15027
1971.25	15269
1971.5	15364
1971.75	15439
1972	15647
1972.25	15816
1972.5	16079
1972.75	16284
1973	16623
1973.25	16890
1973.5	16844
1973.75	16862
1974	16771
1974.25	16586
1974.5	16611
1974.75	16639
1975	16354
1975.25	16458
1975.5	16688
1975.75	16876
1976	17013
1976.25	17316
1976.5	17438
1976.75	17577
1977	17758
1977.25	17925
1977.5	17979
1977.75	18098
1978	18318
1978.25	18378
1978.5	18724
1978.75	18747
1979	18844
1979.25	18893
1979.5	18832
1979.75	18957
1980	18946
1980.25	18866
1980.5	18389
1980.75	18535
1981	18735
1981.25	18760
1981.5	18719
1981.75	18754
1982	18577
1982.25	18674
1982.5	18690
1982.75	18767
1983	19049
1983.25	19198
1983.5	19549
1983.75	19850
1984	20120
1984.25	20248
1984.5	20490
1984.75	20592
1985	20808
1985.25	21122
1985.5	21271
1985.75	21619
1986	21612
1986.25	21758
1986.5	21949
1986.75	22282
1987	22365
1987.25	22344
1987.5	22601
1987.75	22802
1988	22794
1988.25	23151
1988.5	23273
1988.75	23419
1989	23626
1989.25	23688
1989.5	23745
1989.75	23909
1990	23948
1990.25	24095
1990.5	24093
1990.75	24103
1991	23836
1991.25	23673
1991.5	23793
1991.75	23827
1992	23734
1992.25	24107
1992.5	24190
1992.75	24359
1993	24565
1993.25	24586
1993.5	24735
1993.75	24925
1994	25063
1994.25	25282
1994.5	25404
1994.75	25516
1995	25713
1995.25	25708
1995.5	25860
1995.75	26010
1996	26111
1996.25	26287
1996.5	26494
1996.75	26568
1997	26694
1997.25	26904
1997.5	26948
1997.75	27317
1998	27557
1998.25	27765
1998.5	28176
1998.75	28455
1999	28779
1999.25	28985
1999.5	29327
1999.75	29564
2000	29907
2000.25	30290
2000.5	30507
2000.75	30723
2001	30905
2001.25	30958
2001.5	30958
2001.75	30983
2002	31367
2002.25	31394
2002.5	31485
2002.75	31633
2003	31738
2003.25	31821
2003.5	32106
2003.75	32497
2004	32639
2004.25	32866
2004.5	32998
2004.75	33280
2005	33559
2005.25	33683
2005.5	33992
2005.75	34235
2006	34251
2006.25	34557
2006.5	34654
2006.75	34774
2007	35021
2007.25	35140
2007.5	35126
2007.75	35233
2008	35244
2008.25	35073
2008.5	35053
2008.75	34706
2009	34302
2009.25	34156
2009.5	33948
2009.75	34103
2010	33974
2010.25	34074
2010.5	34283
2010.75	34455
2011	34615
2011.25	34706
2011.5	34726
2011.75	34794
2012	34792
2012.25	35015
2012.5	35011
2012.75	35001
2013	35092
2013.25	35223
2013.5	35195
2013.75	35270
2014	35505
2014.25	35587
2014.5	35917
2014.75	36231
2015	36597
2015.25	36863
2015.5	37096
2015.75	37332
2016	37459
2016.25	37686
2016.5	37866
2016.75	38039
2017	38204
2017.25	38451
2017.5	38570
2017.75	38727
2018	39065
2018.25	39219
2018.5	39480
2018.75	39683
2019	39784
2019.25	39927
2019.5	40250
2019.75	40463
2020	40566
2020.25	39810
2020.5	35951
2020.75	39122
2021	39294

## Sheet: DataAppendix
Name	Description	Tcode	Group	SubGroup	None	Small	FINAL
BAA10YM	Moody’s Seasoned Baa Corporate Bond Yield Relative to Yield on 10-Year Treasury	1	2	21	0	0	0
EBP	Excess Bond Premium - Gilchrist and Zakrajšek (2012) - Downloadable from https://www.federalreserve.gov/econresdata/notes/feds-notes/2016/recession-risk-and-the-excess-bond-premium-20160408.html	2	2	21	0	0	1
GFDEGDQ188S	Federal Debt: Total Public Debt as Percent of GDP (Percent)	2	2	27	0	1	1
GPDIC1	Real Gross Private Domestic Investment, 3 decimal (Billions of Chained 2012 Dollars)	5	2	24	0	0	1
HOABS	Business Sector: Hours of All Persons (Index 2012=100)	5	2	22	0	1	1
JLNUNC	JLN Macroeconomic Uncertainty Index for United States (cite Jurado et al 2015 AER)	2	1	12	0	0	1
LIQA	Liquid assets = BOGZ1FL104001005Q + BOGZ1FL874001005Q	5	2	21	0	0	1
NETFI_GDP	Balance on Current Account, NIPA's/Gross Domestic Product	2	2	27	0	0	1
PAYEMS	All Employees: Total nonfarm (Thousands of Persons)	5	2	22	0	1	1
PCECC96	Real Personal Consumption Expenditures per Capita (Billions of Chained 2012 Dollars) - A794RX0Q048SBEA	5	1	11	0	1	1
S&P 500	S&P’s Common Stock Price Index: Composite	5	1	13	0	1	1
TFP	Business Sector TFP (in log, recalculated from annualised percentage change from Fernald) - Downloadable from https://www.frbsf.org/economic-research/indicators-data/total-factor-productivity-tfp/	5	1	11	0	0	1
TWEXMMTH	Trade Weighted U.S. Dollar Index: Major Currencies (Index March 1973=100), available from 1973, use TWEXBGSMTH since 2020Q1 and adjust by the average ratio between TWEXMMTH and TWEXAFEGSMTH	5	2	27	0	0	1
UNRATE	Civilian Unemployment Rate (Percent)	2	2	22	0	0	1

## Sheet: CodeNote
Tcode
1
2
3
4
5
GroupCode
1	All inter IS
2	All Aggregate saving/investment
3	Other
SubGroupCode
11	IS: aggregate growth
12	IS: growth second-order terms
13	IS: stock second-order terms
21	Spread + liquidity
22	Labour force
23	Uncertainty
24	Relative price of investment
25	Inequality
26	Demographics
27	National Saving
31	Inflation
32	Money
